# Supplementary material for: Policy Effectiveness Analysis of China’s Circuit Breaker Mechanism
Source: Hindawi journal article supplement (doi:10.1155/2020/9024723), 2020-09-28
Supplement: f1 [file 9024723.f1.zip]

Archive with 9 entries (9 files):
- 9024723.f1/Data for consumption industry.xlsx
- 9024723.f1/Data for energy industry.xlsx
- 9024723.f1/Data for finance industry.xlsx
- 9024723.f1/Data for industry.xlsx
- 9024723.f1/Data for information industry.xlsx
- 9024723.f1/Data for material industry.xlsx
- 9024723.f1/Data for pharmaceutical industry.xlsx
- 9024723.f1/Data for public industry.xlsx
- 9024723.f1/Data for telecommunications industry.xlsx
