# Supplementary material for: Policy Effectiveness Analysis of China’s Circuit Breaker Mechanism
Source: Hindawi journal article supplement (doi:10.1155/2020/9024723), 2020-09-28
Supplement: f1 [file 9024723.f1.zip › 9024723.f1/Data for consumption industry.xlsx]

## Sheet: file
	HV5	HV15	HV30	HV50
2015-07-01	0.823	0.658	0.573	0.494
2015-07-02	0.837	0.658	0.586	0.489
2015-07-03	0.751	0.667	0.591	0.501
2015-07-06	0.822	0.679	0.594	0.506
2015-07-07	0.536	0.688	0.589	0.515
2015-07-08	0.597	0.714	0.607	0.535
2015-07-09	0.982	0.817	0.657	0.558
2015-07-10	1.061	0.889	0.677	0.583
2015-07-13	1.066	0.857	0.686	0.588
2015-07-14	1.002	0.837	0.671	0.59
2015-07-15	0.864	0.831	0.673	0.59
2015-07-16	0.73	0.834	0.676	0.591
2015-07-17	0.567	0.795	0.688	0.598
2015-07-20	0.508	0.787	0.688	0.595
2015-07-21	0.47	0.74	0.683	0.593
2015-07-22	0.294	0.722	0.684	0.592
2015-07-23	0.295	0.698	0.683	0.593
2015-07-24	0.2	0.658	0.682	0.593
2015-07-27	0.693	0.762	0.722	0.627
2015-07-28	0.706	0.738	0.723	0.627
2015-07-29	0.793	0.684	0.733	0.629
2015-07-30	0.76	0.63	0.734	0.632
2015-07-31	0.79	0.546	0.728	0.627
2015-08-03	0.369	0.527	0.699	0.625
2015-08-04	0.399	0.535	0.693	0.621
2015-08-05	0.396	0.517	0.688	0.621
2015-08-06	0.326	0.513	0.683	0.621
2015-08-07	0.337	0.488	0.648	0.606
2015-08-10	0.408	0.514	0.653	0.613
2015-08-11	0.374	0.514	0.626	0.602
2015-08-12	0.319	0.515	0.616	0.599
2015-08-13	0.281	0.51	0.602	0.599
2015-08-14	0.278	0.507	0.579	0.599
2015-08-17	0.138	0.307	0.575	0.599
2015-08-18	0.482	0.414	0.588	0.611
2015-08-19	0.52	0.395	0.552	0.613
2015-08-20	0.528	0.392	0.516	0.612
2015-08-21	0.547	0.425	0.481	0.617
2015-08-24	0.634	0.546	0.529	0.641
2015-08-25	0.607	0.535	0.536	0.646
2015-08-26	0.583	0.544	0.53	0.646
2015-08-27	0.874	0.605	0.553	0.66
2015-08-28	0.906	0.613	0.545	0.658
2015-08-31	0.563	0.583	0.545	0.638
2015-09-01	0.378	0.583	0.545	0.629
2015-09-02	0.396	0.584	0.545	0.625
2015-09-07	0.333	0.587	0.546	0.625
2015-09-08	0.292	0.596	0.55	0.603
2015-09-09	0.325	0.598	0.487	0.602
2015-09-10	0.33	0.555	0.486	0.584
2015-09-11	0.33	0.544	0.473	0.578
2015-09-14	0.204	0.538	0.467	0.57
2015-09-15	0.246	0.526	0.47	0.561
2015-09-16	0.439	0.426	0.491	0.568
2015-09-17	0.486	0.405	0.487	0.562
2015-09-18	0.492	0.403	0.485	0.542
2015-09-21	0.503	0.343	0.487	0.514
2015-09-22	0.428	0.326	0.484	0.485
2015-09-23	0.3	0.335	0.471	0.479
2015-09-24	0.203	0.335	0.472	0.477
2015-09-25	0.225	0.339	0.472	0.47
2015-09-28	0.181	0.31	0.471	0.468
2015-09-29	0.157	0.301	0.47	0.457
2015-09-30	0.121	0.293	0.467	0.458
2015-10-08	0.28	0.323	0.45	0.465
2015-10-09	0.241	0.323	0.446	0.465
2015-10-12	0.256	0.332	0.446	0.466
2015-10-13	0.203	0.303	0.431	0.465
2015-10-14	0.262	0.249	0.343	0.418
2015-10-15	0.211	0.222	0.321	0.42
2015-10-16	0.208	0.223	0.32	0.413
2015-10-19	0.192	0.221	0.285	0.408
2015-10-20	0.192	0.22	0.276	0.407
2015-10-21	0.337	0.256	0.295	0.413
2015-10-22	0.342	0.268	0.301	0.411
2015-10-23	0.369	0.266	0.307	0.411
2015-10-26	0.368	0.265	0.288	0.411
2015-10-27	0.375	0.263	0.286	0.409
2015-10-28	0.26	0.277	0.288	0.401
2015-10-29	0.223	0.253	0.287	0.402
2015-10-30	0.162	0.253	0.286	0.402
2015-11-02	0.183	0.253	0.291	0.402
2015-11-03	0.183	0.254	0.277	0.402
2015-11-04	0.32	0.288	0.266	0.41
2015-11-05	0.318	0.279	0.248	0.387
2015-11-06	0.321	0.278	0.249	0.385
2015-11-09	0.251	0.28	0.248	0.381
2015-11-10	0.247	0.282	0.249	0.37
2015-11-11	0.111	0.229	0.239	0.308
2015-11-12	0.13	0.22	0.241	0.291
2015-11-13	0.191	0.228	0.248	0.295
2015-11-16	0.155	0.227	0.248	0.272
2015-11-17	0.167	0.225	0.245	0.266
2015-11-18	0.165	0.215	0.246	0.266
2015-11-19	0.185	0.214	0.231	0.266
2015-11-20	0.067	0.214	0.231	0.266
2015-11-23	0.079	0.202	0.225	0.255
2015-11-24	0.076	0.2	0.225	0.252
2015-11-25	0.135	0.144	0.225	0.252
2015-11-26	0.129	0.143	0.218	0.251
2015-11-27	0.315	0.208	0.245	0.267
2015-11-30	0.32	0.199	0.245	0.267
2015-12-01	0.336	0.206	0.247	0.258
2015-12-02	0.372	0.235	0.233	0.244
2015-12-03	0.372	0.234	0.225	0.233
2015-12-04	0.2	0.218	0.219	0.234
2015-12-07	0.198	0.218	0.219	0.233
2015-12-08	0.273	0.236	0.227	0.238
2015-12-09	0.177	0.236	0.223	0.233
2015-12-10	0.17	0.234	0.222	0.234
2015-12-11	0.168	0.235	0.222	0.232
2015-12-14	0.199	0.241	0.22	0.233
2015-12-15	0.122	0.242	0.219	0.232
2015-12-16	0.133	0.233	0.191	0.233
2015-12-17	0.173	0.245	0.197	0.225
2015-12-18	0.157	0.189	0.201	0.227
2015-12-21	0.353	0.276	0.25	0.251
2015-12-22	0.356	0.276	0.249	0.25
2015-12-23	0.358	0.268	0.25	0.25
2015-12-24	0.406	0.275	0.252	0.248
2015-12-25	0.41	0.27	0.243	0.247
2015-12-28	0.17	0.294	0.255	0.254
2015-12-29	0.202	0.278	0.256	0.254
2015-12-30	0.21	0.278	0.256	0.241
2015-12-31	0.204	0.278	0.255	0.236
2016-01-04	0.487	0.399	0.322	0.277
2016-01-05	0.521	0.4	0.325	0.279
2016-01-06	0.52	0.402	0.326	0.279
2016-01-07	0.63	0.479	0.371	0.312
2016-01-08	0.686	0.48	0.375	0.314
2016-01-11	0.599	0.499	0.381	0.329
2016-01-12	0.571	0.427	0.381	0.327
2016-01-13	0.532	0.422	0.38	0.328
2016-01-14	0.427	0.445	0.378	0.321
2016-01-15	0.406	0.45	0.384	0.325
2016-01-18	0.288	0.453	0.384	0.324
2016-01-19	0.383	0.482	0.398	0.332
2016-01-20	0.423	0.48	0.399	0.336
2016-01-21	0.393	0.479	0.401	0.337
2016-01-22	0.353	0.483	0.402	0.338
2016-01-25	0.356	0.417	0.403	0.335
2016-01-26	0.359	0.441	0.419	0.35
2016-01-27	0.357	0.436	0.419	0.349
2016-01-28	0.354	0.366	0.419	0.35
2016-01-29	0.449	0.384	0.427	0.358
2016-02-01	0.437	0.343	0.423	0.358
2016-02-02	0.28	0.352	0.392	0.36
2016-02-03	0.28	0.349	0.392	0.36
2016-02-04	0.225	0.338	0.394	0.359
2016-02-05	0.149	0.32	0.394	0.359
2016-02-15	0.166	0.321	0.394	0.35
2016-02-16	0.217	0.308	0.4	0.355
2016-02-17	0.213	0.293	0.398	0.354
2016-02-18	0.221	0.285	0.398	0.349
2016-02-19	0.215	0.284	0.398	0.349
2016-02-22	0.209	0.292	0.357	0.352
2016-02-23	0.144	0.205	0.354	0.352
2016-02-24	0.145	0.204	0.354	0.349
2016-02-25	0.458	0.315	0.342	0.369
2016-02-26	0.477	0.294	0.34	0.371
2016-02-29	0.447	0.306	0.32	0.373
2016-03-01	0.484	0.306	0.324	0.374
2016-03-02	0.548	0.329	0.334	0.381
2016-03-03	0.291	0.331	0.33	0.382
2016-03-04	0.306	0.341	0.327	0.384
2016-03-07	0.204	0.338	0.327	0.382
2016-03-08	0.253	0.327	0.314	0.362
2016-03-09	0.231	0.332	0.308	0.362
2016-03-10	0.217	0.33	0.303	0.362
2016-03-11	0.083	0.331	0.303	0.362
2016-03-14	0.102	0.323	0.303	0.362
2016-03-15	0.172	0.331	0.271	0.361
2016-03-16	0.164	0.333	0.273	0.36
2016-03-17	0.172	0.224	0.269	0.361
2016-03-18	0.158	0.221	0.258	0.362
2016-03-21	0.17	0.197	0.259	0.332
2016-03-22	0.15	0.193	0.256	0.33
2016-03-23	0.093	0.164	0.256	0.33
2016-03-24	0.105	0.16	0.256	0.296
2016-03-25	0.108	0.136	0.255	0.294
2016-03-28	0.096	0.14	0.254	0.276
2016-03-29	0.172	0.155	0.252	0.279
2016-03-30	0.207	0.154	0.255	0.28
2016-03-31	0.206	0.155	0.254	0.276
2016-04-01	0.22	0.159	0.256	0.269
2016-04-05	0.208	0.16	0.253	0.27
2016-04-06	0.166	0.155	0.255	0.262
2016-04-07	0.208	0.174	0.262	0.26
2016-04-08	0.23	0.188	0.205	0.259
2016-04-11	0.234	0.187	0.202	0.259
2016-04-12	0.214	0.178	0.191	0.259
2016-04-13	0.174	0.179	0.187	0.234
2016-04-14	0.144	0.18	0.171	0.234
2016-04-15	0.069	0.18	0.168	0.231
2016-04-18	0.121	0.185	0.161	0.225
2016-04-19	0.12	0.175	0.16	0.225
2016-04-20	0.179	0.186	0.172	0.228
2016-04-21	0.148	0.165	0.168	0.228
2016-04-22	0.218	0.18	0.173	0.23
2016-04-25	0.204	0.178	0.172	0.229
2016-04-26	0.208	0.174	0.172	0.228
2016-04-27	0.104	0.163	0.165	0.222
2016-04-28	0.103	0.146	0.162	0.222
2016-04-29	0.102	0.146	0.166	0.223
2016-05-03	0.24	0.207	0.194	0.237
2016-05-04	0.274	0.21	0.192	0.235
2016-05-05	0.274	0.21	0.192	0.235
2016-05-06	0.408	0.253	0.216	0.247
2016-05-09	0.399	0.255	0.218	0.211
2016-05-10	0.273	0.255	0.219	0.211
2016-05-11	0.343	0.271	0.226	0.21
2016-05-12	0.343	0.252	0.222	0.208
2016-05-13	0.241	0.259	0.219	0.202
2016-05-16	0.228	0.257	0.222	0.202
2016-05-17	0.237	0.261	0.222	0.196
2016-05-18	0.167	0.27	0.225	0.199
2016-05-19	0.168	0.271	0.221	0.199
2016-05-20	0.185	0.273	0.216	0.198
2016-05-23	0.17	0.269	0.213	0.198
2016-05-24	0.177	0.223	0.215	0.2
2016-05-25	0.15	0.223	0.216	0.201
2016-05-26	0.15	0.221	0.216	0.198
2016-05-27	0.115	0.178	0.215	0.196
2016-05-30	0.073	0.175	0.215	0.195
2016-05-31	0.244	0.209	0.229	0.206
2016-06-01	0.224	0.184	0.229	0.203
2016-06-02	0.21	0.186	0.219	0.204
2016-06-03	0.249	0.217	0.235	0.215
2016-06-06	0.293	0.22	0.235	0.217
2016-06-07	0.243	0.216	0.235	0.216
2016-06-08	0.279	0.212	0.239	0.216
2016-06-13	0.344	0.24	0.251	0.221
2016-06-14	0.249	0.244	0.255	0.22
2016-06-15	0.285	0.25	0.255	0.223
2016-06-16	0.285	0.248	0.234	0.223
2016-06-17	0.293	0.248	0.237	0.224
2016-06-20	0.2	0.25	0.238	0.223
2016-06-21	0.204	0.254	0.218	0.22
2016-06-22	0.172	0.255	0.217	0.217
2016-06-23	0.17	0.23	0.216	0.218
2016-06-24	0.135	0.24	0.21	0.221
2016-06-27	0.292	0.27	0.228	0.231
2016-06-28	0.279	0.236	0.224	0.23
2016-06-29	0.278	0.232	0.222	0.23
2016-06-30	0.265	0.233	0.221	0.228
