# Supplementary material for: Policy Effectiveness Analysis of China’s Circuit Breaker Mechanism
Source: Hindawi journal article supplement (doi:10.1155/2020/9024723), 2020-09-28
Supplement: f1 [file 9024723.f1.zip › 9024723.f1/Data for energy industry.xlsx]

## Sheet: file
	HV5	HV15	HV30	HV50
2015-07-01	0.664	0.609	0.591	0.532
2015-07-02	0.643	0.615	0.599	0.535
2015-07-03	0.651	0.657	0.629	0.555
2015-07-06	0.657	0.653	0.617	0.555
2015-07-07	0.52	0.653	0.608	0.554
2015-07-08	0.661	0.712	0.647	0.565
2015-07-09	0.971	0.765	0.675	0.583
2015-07-10	0.928	0.805	0.655	0.595
2015-07-13	0.936	0.775	0.658	0.595
2015-07-14	0.98	0.761	0.639	0.598
2015-07-15	0.636	0.717	0.637	0.596
2015-07-16	0.497	0.705	0.637	0.592
2015-07-17	0.385	0.672	0.63	0.585
2015-07-20	0.347	0.672	0.629	0.584
2015-07-21	0.224	0.655	0.621	0.58
2015-07-22	0.179	0.636	0.617	0.581
2015-07-23	0.161	0.624	0.619	0.581
2015-07-24	0.115	0.543	0.62	0.58
2015-07-27	0.686	0.661	0.659	0.607
2015-07-28	0.696	0.673	0.66	0.61
2015-07-29	0.737	0.576	0.666	0.61
2015-07-30	0.698	0.524	0.657	0.611
2015-07-31	0.657	0.478	0.653	0.61
2015-08-03	0.37	0.461	0.627	0.602
2015-08-04	0.387	0.471	0.624	0.602
2015-08-05	0.348	0.476	0.604	0.601
2015-08-06	0.316	0.475	0.594	0.599
2015-08-07	0.328	0.471	0.57	0.574
2015-08-10	0.467	0.525	0.593	0.587
2015-08-11	0.449	0.529	0.588	0.573
2015-08-12	0.38	0.525	0.573	0.572
2015-08-13	0.35	0.523	0.566	0.572
2015-08-14	0.363	0.522	0.527	0.564
2015-08-17	0.119	0.364	0.526	0.563
2015-08-18	0.464	0.434	0.558	0.574
2015-08-19	0.468	0.419	0.496	0.569
2015-08-20	0.455	0.429	0.47	0.572
2015-08-21	0.421	0.452	0.458	0.576
2015-08-24	0.519	0.573	0.511	0.602
2015-08-25	0.644	0.654	0.571	0.633
2015-08-26	0.523	0.657	0.574	0.633
2015-08-27	0.879	0.697	0.593	0.637
2015-08-28	1.145	0.749	0.618	0.653
2015-08-31	0.995	0.696	0.616	0.638
2015-09-01	0.552	0.703	0.622	0.635
2015-09-02	0.502	0.702	0.62	0.623
2015-09-07	0.55	0.695	0.618	0.618
2015-09-08	0.36	0.709	0.623	0.606
2015-09-09	0.419	0.732	0.587	0.61
2015-09-10	0.414	0.701	0.583	0.605
2015-09-11	0.38	0.7	0.574	0.598
2015-09-14	0.386	0.697	0.575	0.597
2015-09-15	0.377	0.692	0.578	0.581
2015-09-16	0.533	0.649	0.604	0.594
2015-09-17	0.539	0.502	0.596	0.595
2015-09-18	0.54	0.479	0.595	0.566
2015-09-21	0.516	0.456	0.598	0.547
2015-09-22	0.43	0.388	0.595	0.535
2015-09-23	0.343	0.415	0.573	0.535
2015-09-24	0.33	0.406	0.572	0.533
2015-09-25	0.339	0.398	0.572	0.533
2015-09-28	0.306	0.387	0.57	0.533
2015-09-29	0.299	0.39	0.571	0.531
2015-09-30	0.228	0.36	0.571	0.529
2015-10-08	0.333	0.384	0.559	0.535
2015-10-09	0.344	0.389	0.562	0.535
2015-10-12	0.395	0.394	0.567	0.539
2015-10-13	0.293	0.375	0.558	0.538
2015-10-14	0.27	0.304	0.498	0.505
2015-10-15	0.25	0.304	0.408	0.504
2015-10-16	0.251	0.307	0.395	0.501
2015-10-19	0.222	0.306	0.382	0.499
2015-10-20	0.188	0.306	0.343	0.499
2015-10-21	0.404	0.318	0.364	0.507
2015-10-22	0.364	0.318	0.36	0.502
2015-10-23	0.352	0.314	0.355	0.501
2015-10-26	0.355	0.313	0.347	0.501
2015-10-27	0.34	0.284	0.343	0.498
2015-10-28	0.161	0.29	0.333	0.481
2015-10-29	0.141	0.269	0.329	0.479
2015-10-30	0.129	0.271	0.33	0.48
2015-11-02	0.14	0.255	0.328	0.48
2015-11-03	0.148	0.253	0.317	0.48
2015-11-04	0.388	0.312	0.303	0.492
2015-11-05	0.42	0.313	0.303	0.477
2015-11-06	0.394	0.313	0.305	0.479
2015-11-09	0.267	0.314	0.305	0.475
2015-11-10	0.215	0.313	0.304	0.469
2015-11-11	0.16	0.252	0.283	0.424
2015-11-12	0.186	0.261	0.286	0.36
2015-11-13	0.244	0.282	0.294	0.357
2015-11-16	0.229	0.284	0.294	0.346
2015-11-17	0.218	0.282	0.279	0.321
2015-11-18	0.218	0.278	0.28	0.321
2015-11-19	0.228	0.28	0.269	0.318
2015-11-20	0.113	0.274	0.268	0.314
2015-11-23	0.144	0.26	0.258	0.31
2015-11-24	0.134	0.258	0.256	0.306
2015-11-25	0.128	0.198	0.257	0.299
2015-11-26	0.111	0.172	0.248	0.297
2015-11-27	0.479	0.317	0.313	0.332
2015-11-30	0.483	0.307	0.313	0.328
2015-12-01	0.489	0.303	0.311	0.321
2015-12-02	0.556	0.333	0.299	0.304
2015-12-03	0.57	0.336	0.299	0.301
2015-12-04	0.274	0.33	0.303	0.304
2015-12-07	0.265	0.327	0.302	0.303
2015-12-08	0.355	0.34	0.312	0.308
2015-12-09	0.25	0.34	0.311	0.298
2015-12-10	0.202	0.336	0.311	0.297
2015-12-11	0.187	0.334	0.31	0.296
2015-12-14	0.3	0.355	0.312	0.301
2015-12-15	0.212	0.355	0.313	0.294
2015-12-16	0.231	0.362	0.29	0.296
2015-12-17	0.228	0.366	0.283	0.29
2015-12-18	0.209	0.238	0.279	0.289
2015-12-21	0.171	0.242	0.28	0.283
2015-12-22	0.121	0.242	0.279	0.282
2015-12-23	0.131	0.218	0.279	0.282
2015-12-24	0.127	0.213	0.277	0.277
2015-12-25	0.124	0.198	0.269	0.276
2015-12-28	0.205	0.229	0.278	0.282
2015-12-29	0.229	0.197	0.28	0.282
2015-12-30	0.23	0.197	0.279	0.266
2015-12-31	0.232	0.2	0.278	0.266
2016-01-04	0.477	0.341	0.333	0.303
2016-01-05	0.484	0.321	0.332	0.302
2016-01-06	0.69	0.405	0.376	0.33
2016-01-07	0.854	0.502	0.43	0.368
2016-01-08	0.992	0.551	0.46	0.387
2016-01-11	0.961	0.595	0.449	0.407
2016-01-12	0.96	0.588	0.449	0.404
2016-01-13	0.79	0.588	0.451	0.406
2016-01-14	0.643	0.597	0.446	0.396
2016-01-15	0.505	0.622	0.464	0.405
2016-01-18	0.397	0.618	0.462	0.404
2016-01-19	0.498	0.636	0.473	0.409
2016-01-20	0.491	0.631	0.468	0.408
2016-01-21	0.457	0.632	0.472	0.411
2016-01-22	0.387	0.649	0.48	0.416
2016-01-25	0.392	0.61	0.486	0.418
2016-01-26	0.651	0.677	0.522	0.447
2016-01-27	0.679	0.624	0.525	0.448
2016-01-28	0.673	0.561	0.523	0.449
2016-01-29	0.668	0.517	0.528	0.453
2016-02-01	0.62	0.482	0.532	0.456
2016-02-02	0.375	0.491	0.532	0.458
2016-02-03	0.369	0.49	0.532	0.458
2016-02-04	0.361	0.487	0.536	0.46
2016-02-05	0.319	0.45	0.537	0.461
2016-02-15	0.223	0.448	0.536	0.438
2016-02-16	0.296	0.452	0.544	0.445
2016-02-17	0.216	0.452	0.544	0.446
2016-02-18	0.222	0.439	0.544	0.441
2016-02-19	0.243	0.427	0.544	0.44
2016-02-22	0.259	0.436	0.522	0.445
2016-02-23	0.21	0.285	0.522	0.445
2016-02-24	0.211	0.282	0.493	0.442
2016-02-25	0.608	0.411	0.489	0.468
2016-02-26	0.679	0.425	0.475	0.476
2016-02-29	0.626	0.406	0.447	0.476
2016-03-01	0.648	0.407	0.451	0.475
2016-03-02	0.752	0.436	0.47	0.488
2016-03-03	0.373	0.436	0.468	0.487
2016-03-04	0.345	0.437	0.443	0.487
2016-03-07	0.301	0.433	0.441	0.488
2016-03-08	0.324	0.421	0.434	0.486
2016-03-09	0.313	0.457	0.447	0.493
2016-03-10	0.343	0.47	0.447	0.495
2016-03-11	0.32	0.469	0.441	0.495
2016-03-14	0.348	0.457	0.439	0.497
2016-03-15	0.34	0.458	0.377	0.494
2016-03-16	0.244	0.458	0.376	0.493
2016-03-17	0.146	0.334	0.37	0.494
2016-03-18	0.148	0.31	0.366	0.495
2016-03-21	0.135	0.308	0.354	0.473
2016-03-22	0.136	0.307	0.354	0.474
2016-03-23	0.141	0.234	0.349	0.455
2016-03-24	0.259	0.261	0.36	0.428
2016-03-25	0.239	0.255	0.359	0.411
2016-03-28	0.192	0.25	0.359	0.39
2016-03-29	0.193	0.252	0.351	0.391
2016-03-30	0.341	0.243	0.36	0.395
2016-03-31	0.258	0.218	0.36	0.393
2016-04-01	0.278	0.228	0.363	0.378
2016-04-05	0.257	0.221	0.353	0.377
2016-04-06	0.193	0.217	0.353	0.372
2016-04-07	0.158	0.223	0.354	0.371
2016-04-08	0.185	0.223	0.281	0.367
2016-04-11	0.18	0.23	0.269	0.365
2016-04-12	0.186	0.228	0.268	0.362
2016-04-13	0.238	0.241	0.271	0.32
2016-04-14	0.208	0.241	0.235	0.319
2016-04-15	0.167	0.2	0.235	0.315
2016-04-18	0.201	0.209	0.235	0.313
2016-04-19	0.205	0.208	0.234	0.305
2016-04-20	0.171	0.235	0.247	0.31
2016-04-21	0.225	0.208	0.223	0.308
2016-04-22	0.222	0.209	0.21	0.307
2016-04-25	0.235	0.198	0.21	0.307
2016-04-26	0.236	0.197	0.206	0.307
2016-04-27	0.124	0.198	0.206	0.3
2016-04-28	0.097	0.196	0.206	0.3
2016-04-29	0.101	0.192	0.205	0.3
2016-05-03	0.103	0.182	0.204	0.3
2016-05-04	0.122	0.181	0.203	0.294
2016-05-05	0.111	0.147	0.201	0.294
2016-05-06	0.263	0.203	0.228	0.305
2016-05-09	0.339	0.25	0.243	0.274
2016-05-10	0.312	0.251	0.243	0.262
2016-05-11	0.337	0.253	0.243	0.262
2016-05-12	0.342	0.238	0.241	0.259
2016-05-13	0.285	0.226	0.222	0.234
2016-05-16	0.051	0.229	0.223	0.234
2016-05-17	0.108	0.238	0.22	0.235
2016-05-18	0.177	0.241	0.223	0.236
2016-05-19	0.18	0.241	0.221	0.236
2016-05-20	0.184	0.24	0.222	0.222
2016-05-23	0.183	0.242	0.221	0.215
2016-05-24	0.14	0.237	0.215	0.216
2016-05-25	0.095	0.238	0.212	0.213
2016-05-26	0.105	0.245	0.2	0.213
2016-05-27	0.112	0.202	0.2	0.213
2016-05-30	0.111	0.118	0.2	0.211
2016-05-31	0.217	0.166	0.219	0.22
2016-06-01	0.216	0.166	0.219	0.218
2016-06-02	0.216	0.166	0.207	0.217
2016-06-03	0.206	0.164	0.203	0.217
2016-06-06	0.199	0.164	0.203	0.208
2016-06-07	0.025	0.155	0.201	0.208
2016-06-08	0.021	0.136	0.201	0.207
2016-06-13	0.23	0.196	0.22	0.219
2016-06-14	0.23	0.194	0.218	0.207
2016-06-15	0.259	0.198	0.221	0.208
2016-06-16	0.259	0.201	0.221	0.205
2016-06-17	0.282	0.205	0.223	0.206
2016-06-20	0.144	0.201	0.223	0.205
2016-06-21	0.144	0.2	0.199	0.205
2016-06-22	0.173	0.211	0.168	0.208
2016-06-23	0.132	0.174	0.168	0.203
2016-06-24	0.194	0.187	0.176	0.205
2016-06-27	0.234	0.204	0.184	0.202
2016-06-28	0.233	0.205	0.184	0.202
2016-06-29	0.208	0.207	0.184	0.203
2016-06-30	0.207	0.207	0.18	0.202
