# Supplementary material for: Policy Effectiveness Analysis of China’s Circuit Breaker Mechanism
Source: Hindawi journal article supplement (doi:10.1155/2020/9024723), 2020-09-28
Supplement: f1 [file 9024723.f1.zip › 9024723.f1/Data for finance industry.xlsx]

## Sheet: file
	HV5	HV15	HV30	HV50
2015-07-01	0.875	0.578	0.544	0.472
2015-07-02	0.877	0.579	0.544	0.467
2015-07-03	0.784	0.596	0.558	0.47
2015-07-06	0.93	0.679	0.585	0.494
2015-07-07	0.762	0.687	0.583	0.493
2015-07-08	0.919	0.754	0.625	0.523
2015-07-09	1.053	0.81	0.655	0.543
2015-07-10	0.959	0.812	0.632	0.549
2015-07-13	0.886	0.786	0.633	0.55
2015-07-14	0.905	0.779	0.623	0.554
2015-07-15	0.621	0.777	0.623	0.548
2015-07-16	0.399	0.772	0.623	0.548
2015-07-17	0.318	0.719	0.619	0.55
2015-07-20	0.316	0.716	0.619	0.551
2015-07-21	0.227	0.644	0.595	0.549
2015-07-22	0.229	0.617	0.594	0.549
2015-07-23	0.279	0.624	0.6	0.551
2015-07-24	0.246	0.595	0.601	0.552
2015-07-27	0.665	0.641	0.649	0.585
2015-07-28	0.73	0.64	0.652	0.586
2015-07-29	0.746	0.551	0.653	0.576
2015-07-30	0.683	0.481	0.655	0.578
2015-07-31	0.707	0.444	0.646	0.578
2015-08-03	0.309	0.459	0.636	0.575
2015-08-04	0.294	0.456	0.627	0.572
2015-08-05	0.346	0.462	0.628	0.573
2015-08-06	0.279	0.462	0.625	0.573
2015-08-07	0.294	0.453	0.594	0.553
2015-08-10	0.383	0.49	0.604	0.561
2015-08-11	0.392	0.49	0.562	0.55
2015-08-12	0.36	0.491	0.549	0.551
2015-08-13	0.342	0.481	0.549	0.551
2015-08-14	0.337	0.478	0.532	0.545
2015-08-17	0.155	0.29	0.495	0.546
2015-08-18	0.341	0.341	0.505	0.538
2015-08-19	0.381	0.345	0.452	0.539
2015-08-20	0.376	0.344	0.414	0.541
2015-08-21	0.377	0.379	0.407	0.547
2015-08-24	0.615	0.516	0.482	0.582
2015-08-25	0.645	0.544	0.505	0.595
2015-08-26	0.741	0.576	0.518	0.601
2015-08-27	1.107	0.68	0.572	0.628
2015-08-28	1.125	0.686	0.571	0.626
2015-08-31	0.807	0.663	0.575	0.619
2015-09-01	0.371	0.675	0.581	0.615
2015-09-02	0.409	0.677	0.582	0.614
2015-09-07	0.484	0.697	0.59	0.621
2015-09-08	0.493	0.711	0.597	0.606
2015-09-09	0.493	0.718	0.543	0.607
2015-09-10	0.471	0.696	0.539	0.581
2015-09-11	0.464	0.693	0.538	0.573
2015-09-14	0.198	0.686	0.534	0.573
2015-09-15	0.214	0.671	0.536	0.566
2015-09-16	0.288	0.537	0.54	0.548
2015-09-17	0.325	0.447	0.539	0.546
2015-09-18	0.327	0.441	0.537	0.517
2015-09-21	0.329	0.335	0.537	0.495
2015-09-22	0.292	0.332	0.539	0.489
2015-09-23	0.282	0.344	0.526	0.491
2015-09-24	0.24	0.333	0.527	0.487
2015-09-25	0.241	0.331	0.526	0.487
2015-09-28	0.237	0.251	0.525	0.487
2015-09-29	0.169	0.236	0.525	0.483
2015-09-30	0.139	0.23	0.526	0.484
2015-10-08	0.209	0.246	0.514	0.487
2015-10-09	0.232	0.255	0.516	0.489
2015-10-12	0.264	0.278	0.517	0.491
2015-10-13	0.206	0.259	0.502	0.49
2015-10-14	0.273	0.243	0.411	0.447
2015-10-15	0.275	0.235	0.353	0.447
2015-10-16	0.27	0.237	0.348	0.448
2015-10-19	0.207	0.237	0.286	0.444
2015-10-20	0.188	0.23	0.281	0.444
2015-10-21	0.148	0.2	0.279	0.442
2015-10-22	0.106	0.202	0.275	0.44
2015-10-23	0.095	0.201	0.276	0.438
2015-10-26	0.098	0.197	0.225	0.438
2015-10-27	0.102	0.177	0.216	0.437
2015-10-28	0.172	0.203	0.221	0.429
2015-10-29	0.171	0.195	0.221	0.428
2015-10-30	0.159	0.188	0.221	0.428
2015-11-02	0.169	0.167	0.226	0.428
2015-11-03	0.17	0.164	0.215	0.428
2015-11-04	0.414	0.262	0.25	0.445
2015-11-05	0.432	0.279	0.254	0.437
2015-11-06	0.439	0.299	0.266	0.442
2015-11-09	0.321	0.301	0.268	0.438
2015-11-10	0.33	0.303	0.266	0.426
2015-11-11	0.275	0.302	0.253	0.359
2015-11-12	0.288	0.312	0.259	0.321
2015-11-13	0.169	0.315	0.26	0.318
2015-11-16	0.082	0.316	0.259	0.279
2015-11-17	0.109	0.315	0.251	0.276
2015-11-18	0.112	0.304	0.254	0.276
2015-11-19	0.137	0.303	0.252	0.275
2015-11-20	0.136	0.307	0.251	0.275
2015-11-23	0.143	0.297	0.243	0.247
2015-11-24	0.138	0.295	0.241	0.242
2015-11-25	0.122	0.218	0.237	0.24
2015-11-26	0.077	0.183	0.234	0.241
2015-11-27	0.369	0.246	0.284	0.271
2015-11-30	0.393	0.237	0.284	0.271
2015-12-01	0.4	0.24	0.284	0.265
2015-12-02	0.629	0.351	0.328	0.288
2015-12-03	0.623	0.347	0.327	0.283
2015-12-04	0.49	0.366	0.339	0.291
2015-12-07	0.502	0.367	0.34	0.292
2015-12-08	0.518	0.368	0.341	0.292
2015-12-09	0.225	0.368	0.336	0.285
2015-12-10	0.204	0.363	0.337	0.286
2015-12-11	0.102	0.363	0.337	0.286
2015-12-14	0.308	0.398	0.348	0.296
2015-12-15	0.318	0.402	0.352	0.295
2015-12-16	0.323	0.402	0.32	0.296
2015-12-17	0.332	0.408	0.311	0.296
2015-12-18	0.319	0.332	0.297	0.294
2015-12-21	0.26	0.344	0.305	0.294
2015-12-22	0.2	0.345	0.304	0.293
2015-12-23	0.163	0.26	0.305	0.291
2015-12-24	0.232	0.268	0.304	0.291
2015-12-25	0.232	0.234	0.304	0.291
2015-12-28	0.273	0.281	0.322	0.303
2015-12-29	0.295	0.277	0.323	0.303
2015-12-30	0.275	0.278	0.322	0.303
2015-12-31	0.271	0.28	0.32	0.304
2016-01-04	0.469	0.391	0.37	0.337
2016-01-05	0.477	0.351	0.371	0.337
2016-01-06	0.475	0.352	0.372	0.338
2016-01-07	0.57	0.424	0.409	0.362
2016-01-08	0.628	0.421	0.412	0.364
2016-01-11	0.576	0.454	0.411	0.381
2016-01-12	0.581	0.431	0.411	0.38
2016-01-13	0.544	0.428	0.411	0.381
2016-01-14	0.442	0.433	0.371	0.363
2016-01-15	0.419	0.437	0.375	0.358
2016-01-18	0.24	0.434	0.369	0.349
2016-01-19	0.293	0.445	0.377	0.351
2016-01-20	0.312	0.438	0.378	0.353
2016-01-21	0.313	0.44	0.381	0.356
2016-01-22	0.295	0.447	0.383	0.356
2016-01-25	0.296	0.385	0.383	0.356
2016-01-26	0.393	0.426	0.388	0.375
2016-01-27	0.406	0.419	0.388	0.374
2016-01-28	0.398	0.363	0.388	0.375
2016-01-29	0.496	0.387	0.398	0.381
2016-02-01	0.49	0.34	0.396	0.382
2016-02-02	0.331	0.347	0.389	0.385
2016-02-03	0.337	0.347	0.387	0.385
2016-02-04	0.303	0.344	0.389	0.386
2016-02-05	0.223	0.334	0.388	0.386
2016-02-15	0.198	0.335	0.387	0.37
2016-02-16	0.257	0.342	0.392	0.375
2016-02-17	0.243	0.339	0.39	0.375
2016-02-18	0.239	0.326	0.39	0.348
2016-02-19	0.224	0.323	0.391	0.347
2016-02-22	0.228	0.341	0.361	0.349
2016-02-23	0.223	0.254	0.361	0.35
2016-02-24	0.222	0.253	0.359	0.35
2016-02-25	0.454	0.335	0.351	0.366
2016-02-26	0.47	0.309	0.348	0.367
2016-02-29	0.384	0.303	0.319	0.368
2016-03-01	0.434	0.303	0.322	0.357
2016-03-02	0.533	0.336	0.34	0.368
2016-03-03	0.265	0.334	0.337	0.368
2016-03-04	0.284	0.345	0.34	0.371
2016-03-07	0.27	0.342	0.34	0.37
2016-03-08	0.283	0.328	0.334	0.364
2016-03-09	0.2	0.328	0.33	0.364
2016-03-10	0.289	0.346	0.33	0.366
2016-03-11	0.18	0.346	0.33	0.366
2016-03-14	0.195	0.331	0.33	0.366
2016-03-15	0.202	0.326	0.287	0.36
2016-03-16	0.239	0.332	0.29	0.361
2016-03-17	0.088	0.229	0.285	0.361
2016-03-18	0.091	0.23	0.273	0.362
2016-03-21	0.197	0.247	0.281	0.343
2016-03-22	0.277	0.26	0.283	0.344
2016-03-23	0.273	0.225	0.282	0.344
2016-03-24	0.343	0.249	0.29	0.32
2016-03-25	0.336	0.227	0.288	0.318
2016-03-28	0.196	0.236	0.29	0.299
2016-03-29	0.189	0.237	0.282	0.298
2016-03-30	0.288	0.256	0.289	0.303
2016-03-31	0.235	0.23	0.289	0.301
2016-04-01	0.232	0.23	0.289	0.296
2016-04-05	0.185	0.23	0.282	0.296
2016-04-06	0.195	0.234	0.279	0.293
2016-04-07	0.138	0.237	0.283	0.292
2016-04-08	0.141	0.239	0.234	0.287
2016-04-11	0.184	0.241	0.235	0.288
2016-04-12	0.164	0.193	0.233	0.288
2016-04-13	0.196	0.195	0.232	0.26
2016-04-14	0.145	0.195	0.21	0.26
2016-04-15	0.113	0.171	0.21	0.257
2016-04-18	0.145	0.178	0.201	0.25
2016-04-19	0.143	0.165	0.2	0.247
2016-04-20	0.106	0.165	0.2	0.245
2016-04-21	0.098	0.131	0.201	0.245
2016-04-22	0.114	0.134	0.187	0.244
2016-04-25	0.088	0.135	0.188	0.243
2016-04-26	0.093	0.132	0.188	0.242
2016-04-27	0.094	0.13	0.188	0.236
2016-04-28	0.087	0.115	0.183	0.235
2016-04-29	0.075	0.114	0.184	0.236
2016-05-03	0.107	0.108	0.183	0.237
2016-05-04	0.101	0.108	0.155	0.23
2016-05-05	0.092	0.091	0.15	0.228
2016-05-06	0.186	0.124	0.161	0.234
2016-05-09	0.206	0.135	0.156	0.203
2016-05-10	0.158	0.13	0.155	0.203
2016-05-11	0.167	0.128	0.149	0.202
2016-05-12	0.183	0.132	0.15	0.199
2016-05-13	0.125	0.131	0.13	0.182
2016-05-16	0.057	0.128	0.13	0.182
2016-05-17	0.059	0.127	0.13	0.172
2016-05-18	0.073	0.129	0.129	0.172
2016-05-19	0.075	0.129	0.128	0.172
2016-05-20	0.077	0.132	0.123	0.173
2016-05-23	0.077	0.131	0.122	0.164
2016-05-24	0.101	0.123	0.117	0.165
2016-05-25	0.089	0.125	0.117	0.164
2016-05-26	0.085	0.126	0.109	0.164
2016-05-27	0.075	0.093	0.108	0.16
2016-05-30	0.092	0.071	0.11	0.161
2016-05-31	0.23	0.155	0.148	0.177
2016-06-01	0.264	0.163	0.15	0.161
2016-06-02	0.266	0.163	0.149	0.158
2016-06-03	0.26	0.161	0.149	0.158
2016-06-06	0.278	0.165	0.149	0.151
2016-06-07	0.084	0.163	0.148	0.151
2016-06-08	0.059	0.163	0.147	0.147
2016-06-13	0.181	0.195	0.164	0.157
2016-06-14	0.191	0.196	0.165	0.147
2016-06-15	0.206	0.197	0.165	0.148
2016-06-16	0.203	0.195	0.163	0.148
2016-06-17	0.211	0.195	0.164	0.147
2016-06-20	0.08	0.195	0.164	0.146
2016-06-21	0.074	0.195	0.151	0.143
2016-06-22	0.078	0.195	0.145	0.143
2016-06-23	0.07	0.131	0.145	0.14
2016-06-24	0.133	0.138	0.152	0.144
2016-06-27	0.152	0.145	0.153	0.142
2016-06-28	0.156	0.146	0.153	0.142
2016-06-29	0.153	0.146	0.154	0.143
2016-06-30	0.147	0.146	0.154	0.141
