# Supplementary material for: Policy Effectiveness Analysis of China’s Circuit Breaker Mechanism
Source: Hindawi journal article supplement (doi:10.1155/2020/9024723), 2020-09-28
Supplement: f1 [file 9024723.f1.zip › 9024723.f1/Data for industry.xlsx]

## Sheet: file
	HV5	HV15	HV30	HV50
2015-07-01	0.963	0.718	0.642	0.564
2015-07-02	0.986	0.744	0.664	0.581
2015-07-03	0.937	0.767	0.686	0.601
2015-07-06	0.988	0.774	0.682	0.602
2015-07-07	0.57	0.772	0.661	0.603
2015-07-08	0.573	0.784	0.67	0.608
2015-07-09	1.031	0.887	0.727	0.64
2015-07-10	1.084	0.99	0.76	0.67
2015-07-13	1.126	1.005	0.785	0.684
2015-07-14	1.114	0.984	0.769	0.685
2015-07-15	1.07	0.986	0.776	0.694
2015-07-16	0.959	1	0.784	0.693
2015-07-17	0.858	0.979	0.809	0.697
2015-07-20	0.761	0.962	0.804	0.694
2015-07-21	0.707	0.924	0.805	0.691
2015-07-22	0.32	0.877	0.806	0.689
2015-07-23	0.32	0.828	0.812	0.691
2015-07-24	0.257	0.752	0.812	0.691
2015-07-27	0.77	0.869	0.849	0.722
2015-07-28	0.724	0.868	0.851	0.725
2015-07-29	0.953	0.832	0.868	0.736
2015-07-30	0.9	0.79	0.865	0.736
2015-07-31	0.9	0.719	0.862	0.734
2015-08-03	0.628	0.677	0.842	0.732
2015-08-04	0.709	0.712	0.852	0.736
2015-08-05	0.536	0.659	0.846	0.732
2015-08-06	0.508	0.652	0.841	0.732
2015-08-07	0.522	0.618	0.806	0.722
2015-08-10	0.553	0.668	0.814	0.739
2015-08-11	0.518	0.666	0.792	0.729
2015-08-12	0.51	0.666	0.765	0.725
2015-08-13	0.464	0.663	0.739	0.728
2015-08-14	0.482	0.66	0.701	0.727
2015-08-17	0.188	0.51	0.701	0.723
2015-08-18	0.642	0.614	0.738	0.742
2015-08-19	0.671	0.557	0.703	0.744
2015-08-20	0.671	0.589	0.687	0.75
2015-08-21	0.663	0.614	0.657	0.755
2015-08-24	0.657	0.708	0.681	0.777
2015-08-25	0.661	0.714	0.714	0.794
2015-08-26	0.345	0.724	0.706	0.792
2015-08-27	0.97	0.797	0.727	0.806
2015-08-28	1.253	0.856	0.74	0.825
2015-08-31	1.089	0.809	0.742	0.815
2015-09-01	0.82	0.808	0.739	0.809
2015-09-02	0.636	0.809	0.739	0.805
2015-09-07	0.664	0.797	0.735	0.804
2015-09-08	0.415	0.815	0.742	0.783
2015-09-09	0.407	0.825	0.699	0.778
2015-09-10	0.385	0.771	0.695	0.762
2015-09-11	0.385	0.764	0.665	0.748
2015-09-14	0.332	0.746	0.664	0.735
2015-09-15	0.479	0.76	0.682	0.727
2015-09-16	0.725	0.737	0.712	0.743
2015-09-17	0.726	0.644	0.689	0.74
2015-09-18	0.735	0.604	0.691	0.723
2015-09-21	0.754	0.567	0.7	0.704
2015-09-22	0.495	0.487	0.693	0.677
2015-09-23	0.351	0.485	0.663	0.665
2015-09-24	0.323	0.48	0.665	0.663
2015-09-25	0.399	0.493	0.668	0.651
2015-09-28	0.278	0.474	0.663	0.648
2015-09-29	0.296	0.476	0.665	0.635
2015-09-30	0.331	0.469	0.667	0.634
2015-10-08	0.412	0.487	0.639	0.637
2015-10-09	0.347	0.489	0.638	0.638
2015-10-12	0.407	0.501	0.635	0.642
2015-10-13	0.215	0.416	0.623	0.642
2015-10-14	0.306	0.336	0.564	0.607
2015-10-15	0.292	0.337	0.505	0.606
2015-10-16	0.294	0.341	0.482	0.59
2015-10-19	0.254	0.326	0.455	0.587
2015-10-20	0.29	0.339	0.414	0.59
2015-10-21	0.439	0.364	0.425	0.594
2015-10-22	0.426	0.369	0.423	0.581
2015-10-23	0.407	0.339	0.423	0.581
2015-10-26	0.399	0.339	0.409	0.581
2015-10-27	0.352	0.299	0.405	0.577
2015-10-28	0.25	0.326	0.407	0.56
2015-10-29	0.201	0.311	0.405	0.56
2015-10-30	0.195	0.313	0.405	0.56
2015-11-02	0.201	0.291	0.403	0.558
2015-11-03	0.167	0.292	0.359	0.558
2015-11-04	0.346	0.328	0.326	0.566
2015-11-05	0.396	0.333	0.33	0.54
2015-11-06	0.379	0.329	0.33	0.54
2015-11-09	0.279	0.326	0.321	0.528
2015-11-10	0.28	0.315	0.322	0.518
2015-11-11	0.215	0.261	0.311	0.473
2015-11-12	0.149	0.256	0.312	0.43
2015-11-13	0.165	0.27	0.305	0.416
2015-11-16	0.165	0.271	0.305	0.396
2015-11-17	0.163	0.271	0.289	0.364
2015-11-18	0.18	0.262	0.294	0.363
2015-11-19	0.233	0.267	0.286	0.36
2015-11-20	0.191	0.265	0.285	0.36
2015-11-23	0.178	0.25	0.268	0.351
2015-11-24	0.182	0.25	0.269	0.348
2015-11-25	0.129	0.198	0.266	0.345
2015-11-26	0.094	0.159	0.259	0.344
2015-11-27	0.449	0.298	0.317	0.375
2015-11-30	0.443	0.29	0.317	0.372
2015-12-01	0.483	0.3	0.309	0.345
2015-12-02	0.53	0.319	0.296	0.317
2015-12-03	0.541	0.321	0.29	0.315
2015-12-04	0.249	0.321	0.294	0.318
2015-12-07	0.231	0.318	0.294	0.31
2015-12-08	0.291	0.327	0.3	0.314
2015-12-09	0.208	0.324	0.293	0.309
2015-12-10	0.177	0.314	0.294	0.309
2015-12-11	0.162	0.311	0.295	0.303
2015-12-14	0.3	0.342	0.303	0.309
2015-12-15	0.247	0.342	0.302	0.301
2015-12-16	0.246	0.34	0.279	0.3
2015-12-17	0.25	0.355	0.271	0.296
2015-12-18	0.218	0.23	0.268	0.296
2015-12-21	0.165	0.233	0.27	0.286
2015-12-22	0.163	0.231	0.27	0.286
2015-12-23	0.181	0.217	0.271	0.285
2015-12-24	0.165	0.22	0.272	0.281
2015-12-25	0.166	0.207	0.268	0.278
2015-12-28	0.217	0.243	0.279	0.286
2015-12-29	0.229	0.226	0.28	0.28
2015-12-30	0.246	0.226	0.277	0.267
2015-12-31	0.243	0.225	0.274	0.263
2016-01-04	0.574	0.405	0.355	0.319
2016-01-05	0.587	0.381	0.356	0.318
2016-01-06	0.636	0.398	0.365	0.323
2016-01-07	0.788	0.518	0.432	0.37
2016-01-08	0.853	0.515	0.438	0.373
2016-01-11	0.745	0.537	0.423	0.388
2016-01-12	0.767	0.532	0.426	0.388
2016-01-13	0.687	0.534	0.432	0.394
2016-01-14	0.541	0.56	0.434	0.388
2016-01-15	0.549	0.574	0.446	0.39
2016-01-18	0.503	0.581	0.449	0.39
2016-01-19	0.63	0.631	0.475	0.406
2016-01-20	0.556	0.627	0.473	0.407
2016-01-21	0.613	0.635	0.484	0.414
2016-01-22	0.521	0.645	0.488	0.417
2016-01-25	0.515	0.573	0.488	0.416
2016-01-26	0.6	0.642	0.522	0.447
2016-01-27	0.6	0.624	0.521	0.446
2016-01-28	0.616	0.564	0.532	0.456
2016-01-29	0.713	0.586	0.542	0.464
2016-02-01	0.687	0.565	0.542	0.464
2016-02-02	0.562	0.579	0.548	0.471
2016-02-03	0.56	0.567	0.548	0.471
2016-02-04	0.378	0.558	0.553	0.473
2016-02-05	0.312	0.533	0.553	0.473
2016-02-15	0.237	0.527	0.552	0.454
2016-02-16	0.296	0.511	0.565	0.464
2016-02-17	0.295	0.522	0.57	0.466
2016-02-18	0.312	0.496	0.569	0.462
2016-02-19	0.298	0.491	0.57	0.462
2016-02-22	0.261	0.498	0.529	0.464
2016-02-23	0.227	0.369	0.53	0.464
2016-02-24	0.207	0.369	0.527	0.464
2016-02-25	0.666	0.475	0.526	0.498
2016-02-26	0.673	0.452	0.522	0.498
2016-02-29	0.641	0.472	0.516	0.504
2016-03-01	0.717	0.466	0.519	0.502
2016-03-02	0.843	0.512	0.535	0.518
2016-03-03	0.522	0.509	0.529	0.518
2016-03-04	0.522	0.508	0.514	0.515
2016-03-07	0.304	0.507	0.513	0.516
2016-03-08	0.332	0.485	0.492	0.514
2016-03-09	0.145	0.48	0.493	0.514
2016-03-10	0.208	0.486	0.483	0.515
2016-03-11	0.196	0.486	0.48	0.515
2016-03-14	0.295	0.495	0.488	0.52
2016-03-15	0.296	0.493	0.429	0.517
2016-03-16	0.276	0.487	0.428	0.517
2016-03-17	0.201	0.334	0.404	0.519
2016-03-18	0.189	0.338	0.394	0.521
2016-03-21	0.171	0.28	0.39	0.494
2016-03-22	0.179	0.278	0.384	0.494
2016-03-23	0.174	0.207	0.384	0.491
2016-03-24	0.247	0.223	0.386	0.454
2016-03-25	0.222	0.223	0.386	0.452
2016-03-28	0.129	0.225	0.386	0.438
2016-03-29	0.157	0.239	0.376	0.439
2016-03-30	0.297	0.253	0.379	0.437
2016-03-31	0.272	0.227	0.379	0.433
2016-04-01	0.271	0.226	0.379	0.421
2016-04-05	0.278	0.216	0.38	0.423
2016-04-06	0.194	0.217	0.378	0.409
2016-04-07	0.215	0.235	0.379	0.41
2016-04-08	0.226	0.235	0.284	0.4
2016-04-11	0.26	0.234	0.287	0.401
2016-04-12	0.203	0.216	0.257	0.401
2016-04-13	0.249	0.226	0.254	0.359
2016-04-14	0.2	0.226	0.215	0.358
2016-04-15	0.169	0.215	0.215	0.339
2016-04-18	0.204	0.23	0.223	0.333
2016-04-19	0.199	0.227	0.222	0.328
2016-04-20	0.241	0.25	0.24	0.331
2016-04-21	0.206	0.226	0.24	0.333
2016-04-22	0.225	0.224	0.231	0.331
2016-04-25	0.219	0.223	0.232	0.331
2016-04-26	0.235	0.206	0.219	0.331
2016-04-27	0.131	0.206	0.22	0.321
2016-04-28	0.096	0.197	0.221	0.318
2016-04-29	0.091	0.194	0.215	0.318
2016-05-03	0.193	0.206	0.219	0.322
2016-05-04	0.192	0.208	0.209	0.32
2016-05-05	0.177	0.196	0.209	0.319
2016-05-06	0.306	0.223	0.226	0.324
2016-05-09	0.377	0.247	0.238	0.27
2016-05-10	0.321	0.248	0.239	0.271
2016-05-11	0.319	0.25	0.24	0.254
2016-05-12	0.302	0.224	0.235	0.25
2016-05-13	0.246	0.219	0.219	0.224
2016-05-16	0.101	0.221	0.219	0.224
2016-05-17	0.099	0.221	0.219	0.224
2016-05-18	0.129	0.224	0.211	0.226
2016-05-19	0.131	0.224	0.211	0.226
2016-05-20	0.152	0.228	0.209	0.224
2016-05-23	0.155	0.231	0.21	0.22
2016-05-24	0.163	0.207	0.203	0.221
2016-05-25	0.118	0.202	0.203	0.212
2016-05-26	0.118	0.199	0.195	0.212
2016-05-27	0.102	0.166	0.194	0.212
2016-05-30	0.069	0.112	0.194	0.208
2016-05-31	0.249	0.178	0.217	0.218
2016-06-01	0.241	0.177	0.217	0.211
2016-06-02	0.234	0.175	0.2	0.212
2016-06-03	0.23	0.174	0.197	0.212
2016-06-06	0.234	0.173	0.196	0.209
2016-06-07	0.042	0.17	0.196	0.209
2016-06-08	0.046	0.154	0.195	0.208
2016-06-13	0.251	0.218	0.219	0.219
2016-06-14	0.24	0.216	0.219	0.209
2016-06-15	0.293	0.224	0.224	0.212
2016-06-16	0.293	0.224	0.214	0.212
2016-06-17	0.3	0.223	0.213	0.207
2016-06-20	0.145	0.223	0.212	0.207
2016-06-21	0.147	0.224	0.195	0.204
2016-06-22	0.108	0.226	0.176	0.204
2016-06-23	0.079	0.174	0.174	0.2
2016-06-24	0.135	0.182	0.178	0.202
2016-06-27	0.19	0.196	0.184	0.202
2016-06-28	0.19	0.197	0.185	0.202
2016-06-29	0.209	0.209	0.189	0.205
2016-06-30	0.21	0.209	0.188	0.202
