# Supplementary material for: Policy Effectiveness Analysis of China’s Circuit Breaker Mechanism
Source: Hindawi journal article supplement (doi:10.1155/2020/9024723), 2020-09-28
Supplement: f1 [file 9024723.f1.zip › 9024723.f1/Data for information industry.xlsx]

## Sheet: file
	HV5	HV15	HV30	HV50
2015-07-01	1.148	0.814	0.69	0.606
2015-07-02	1.133	0.787	0.699	0.611
2015-07-03	0.98	0.765	0.696	0.615
2015-07-06	0.891	0.756	0.7	0.62
2015-07-07	0.251	0.778	0.721	0.642
2015-07-08	0.353	0.782	0.7	0.642
2015-07-09	0.624	0.776	0.711	0.643
2015-07-10	0.741	0.805	0.71	0.642
2015-07-13	0.908	0.893	0.745	0.664
2015-07-14	0.5	0.905	0.728	0.668
2015-07-15	0.782	0.914	0.722	0.676
2015-07-16	0.781	0.901	0.726	0.676
2015-07-17	0.844	0.868	0.759	0.691
2015-07-20	0.725	0.815	0.766	0.677
2015-07-21	0.709	0.735	0.766	0.663
2015-07-22	0.381	0.722	0.772	0.664
2015-07-23	0.362	0.692	0.768	0.667
2015-07-24	0.408	0.688	0.766	0.671
2015-07-27	0.74	0.764	0.795	0.696
2015-07-28	0.736	0.698	0.792	0.695
2015-07-29	0.868	0.719	0.813	0.705
2015-07-30	0.804	0.737	0.805	0.707
2015-07-31	0.825	0.728	0.792	0.703
2015-08-03	0.639	0.682	0.788	0.707
2015-08-04	0.766	0.716	0.811	0.722
2015-08-05	0.673	0.682	0.811	0.715
2015-08-06	0.631	0.682	0.794	0.714
2015-08-07	0.703	0.648	0.753	0.712
2015-08-10	0.633	0.68	0.738	0.72
2015-08-11	0.549	0.68	0.696	0.706
2015-08-12	0.503	0.674	0.687	0.697
2015-08-13	0.476	0.679	0.677	0.702
2015-08-14	0.466	0.666	0.667	0.702
2015-08-17	0.288	0.553	0.655	0.702
2015-08-18	0.646	0.639	0.659	0.721
2015-08-19	0.724	0.612	0.662	0.726
2015-08-20	0.66	0.6	0.662	0.721
2015-08-21	0.772	0.676	0.694	0.734
2015-08-24	0.846	0.761	0.711	0.758
2015-08-25	0.884	0.775	0.745	0.777
2015-08-26	0.481	0.795	0.747	0.784
2015-08-27	0.973	0.847	0.766	0.79
2015-08-28	1.277	0.89	0.771	0.802
2015-08-31	1.119	0.839	0.765	0.798
2015-09-01	0.881	0.835	0.766	0.796
2015-09-02	0.692	0.837	0.759	0.795
2015-09-07	0.606	0.812	0.752	0.785
2015-09-08	0.462	0.859	0.769	0.765
2015-09-09	0.494	0.886	0.745	0.754
2015-09-10	0.537	0.846	0.747	0.731
2015-09-11	0.519	0.829	0.726	0.727
2015-09-14	0.909	0.887	0.762	0.746
2015-09-15	0.875	0.889	0.786	0.759
2015-09-16	1.183	0.932	0.836	0.788
2015-09-17	1.176	0.852	0.811	0.771
2015-09-18	1.195	0.814	0.814	0.772
2015-09-21	1.042	0.821	0.837	0.781
2015-09-22	0.673	0.771	0.826	0.777
2015-09-23	0.467	0.768	0.806	0.757
2015-09-24	0.405	0.761	0.81	0.754
2015-09-25	0.611	0.789	0.817	0.75
2015-09-28	0.505	0.802	0.82	0.755
2015-09-29	0.518	0.782	0.82	0.74
2015-09-30	0.517	0.765	0.821	0.737
2015-10-08	0.651	0.786	0.813	0.749
2015-10-09	0.447	0.789	0.809	0.749
2015-10-12	0.479	0.687	0.822	0.755
2015-10-13	0.34	0.561	0.795	0.753
2015-10-14	0.443	0.475	0.743	0.73
2015-10-15	0.416	0.482	0.695	0.735
2015-10-16	0.416	0.483	0.665	0.727
2015-10-19	0.405	0.455	0.655	0.723
2015-10-20	0.453	0.469	0.637	0.729
2015-10-21	0.78	0.582	0.674	0.741
2015-10-22	0.765	0.597	0.675	0.735
2015-10-23	0.752	0.537	0.674	0.732
2015-10-26	0.746	0.53	0.674	0.733
2015-10-27	0.709	0.511	0.665	0.73
2015-10-28	0.429	0.545	0.669	0.723
2015-10-29	0.343	0.52	0.658	0.723
2015-10-30	0.329	0.522	0.659	0.721
2015-11-02	0.335	0.506	0.596	0.719
2015-11-03	0.208	0.505	0.538	0.719
2015-11-04	0.516	0.552	0.507	0.734
2015-11-05	0.515	0.526	0.503	0.711
2015-11-06	0.559	0.544	0.51	0.714
2015-11-09	0.454	0.542	0.492	0.713
2015-11-10	0.447	0.523	0.493	0.691
2015-11-11	0.29	0.394	0.489	0.652
2015-11-12	0.36	0.386	0.495	0.614
2015-11-13	0.306	0.407	0.477	0.598
2015-11-16	0.376	0.423	0.475	0.592
2015-11-17	0.422	0.435	0.48	0.58
2015-11-18	0.4	0.422	0.487	0.58
2015-11-19	0.543	0.45	0.479	0.581
2015-11-20	0.489	0.448	0.478	0.58
2015-11-23	0.445	0.442	0.468	0.582
2015-11-24	0.401	0.442	0.468	0.575
2015-11-25	0.336	0.376	0.465	0.572
2015-11-26	0.312	0.396	0.458	0.568
2015-11-27	0.54	0.445	0.494	0.589
2015-11-30	0.558	0.436	0.494	0.547
2015-12-01	0.52	0.436	0.48	0.512
2015-12-02	0.463	0.431	0.427	0.475
2015-12-03	0.55	0.448	0.417	0.475
2015-12-04	0.228	0.436	0.417	0.475
2015-12-07	0.23	0.414	0.417	0.46
2015-12-08	0.292	0.407	0.415	0.464
2015-12-09	0.295	0.4	0.405	0.463
2015-12-10	0.207	0.358	0.406	0.462
2015-12-11	0.202	0.356	0.406	0.447
2015-12-14	0.23	0.361	0.403	0.442
2015-12-15	0.157	0.357	0.403	0.439
2015-12-16	0.137	0.345	0.361	0.439
2015-12-17	0.176	0.345	0.366	0.427
2015-12-18	0.184	0.203	0.345	0.426
2015-12-21	0.181	0.209	0.344	0.415
2015-12-22	0.181	0.206	0.344	0.415
2015-12-23	0.27	0.23	0.347	0.416
2015-12-24	0.217	0.203	0.343	0.404
2015-12-25	0.206	0.197	0.334	0.4
2015-12-28	0.217	0.217	0.326	0.403
2015-12-29	0.219	0.198	0.317	0.394
2015-12-30	0.209	0.2	0.313	0.356
2015-12-31	0.263	0.224	0.296	0.349
2016-01-04	0.616	0.417	0.381	0.397
2016-01-05	0.617	0.41	0.381	0.397
2016-01-06	0.644	0.416	0.382	0.395
2016-01-07	0.709	0.523	0.44	0.432
2016-01-08	0.774	0.509	0.438	0.432
2016-01-11	0.688	0.546	0.434	0.452
2016-01-12	0.761	0.549	0.438	0.452
2016-01-13	0.686	0.54	0.441	0.455
2016-01-14	0.626	0.59	0.461	0.441
2016-01-15	0.648	0.59	0.458	0.446
2016-01-18	0.504	0.606	0.465	0.437
2016-01-19	0.518	0.626	0.471	0.439
2016-01-20	0.507	0.621	0.471	0.441
2016-01-21	0.469	0.616	0.479	0.444
2016-01-22	0.432	0.628	0.481	0.446
2016-01-25	0.399	0.551	0.482	0.443
2016-01-26	0.552	0.612	0.514	0.461
2016-01-27	0.575	0.601	0.512	0.459
2016-01-28	0.568	0.524	0.515	0.461
2016-01-29	0.666	0.556	0.525	0.459
2016-02-01	0.65	0.506	0.525	0.459
2016-02-02	0.454	0.519	0.534	0.466
2016-02-03	0.456	0.511	0.532	0.464
2016-02-04	0.317	0.481	0.535	0.462
2016-02-05	0.276	0.465	0.534	0.46
2016-02-15	0.251	0.456	0.535	0.44
2016-02-16	0.318	0.48	0.554	0.452
2016-02-17	0.3	0.477	0.556	0.454
2016-02-18	0.328	0.451	0.552	0.454
2016-02-19	0.288	0.448	0.551	0.448
2016-02-22	0.286	0.452	0.503	0.45
2016-02-23	0.203	0.319	0.503	0.45
2016-02-24	0.182	0.322	0.499	0.448
2016-02-25	0.582	0.449	0.491	0.479
2016-02-26	0.586	0.423	0.491	0.478
2016-02-29	0.557	0.477	0.483	0.49
2016-03-01	0.672	0.468	0.486	0.492
2016-03-02	0.799	0.498	0.496	0.501
2016-03-03	0.555	0.495	0.48	0.501
2016-03-04	0.581	0.502	0.475	0.498
2016-03-07	0.378	0.506	0.474	0.501
2016-03-08	0.361	0.471	0.467	0.499
2016-03-09	0.263	0.468	0.467	0.499
2016-03-10	0.268	0.468	0.457	0.498
2016-03-11	0.226	0.467	0.455	0.498
2016-03-14	0.347	0.492	0.469	0.507
2016-03-15	0.351	0.491	0.417	0.506
2016-03-16	0.319	0.491	0.418	0.505
2016-03-17	0.365	0.403	0.419	0.513
2016-03-18	0.365	0.42	0.415	0.518
2016-03-21	0.333	0.341	0.419	0.488
2016-03-22	0.325	0.34	0.411	0.487
2016-03-23	0.274	0.312	0.411	0.486
2016-03-24	0.312	0.323	0.414	0.449
2016-03-25	0.238	0.3	0.412	0.449
2016-03-28	0.152	0.304	0.413	0.427
2016-03-29	0.176	0.316	0.398	0.427
2016-03-30	0.335	0.324	0.409	0.431
2016-03-31	0.312	0.315	0.408	0.421
2016-04-01	0.317	0.318	0.409	0.414
2016-04-05	0.35	0.303	0.413	0.416
2016-04-06	0.287	0.298	0.411	0.412
2016-04-07	0.275	0.315	0.416	0.412
2016-04-08	0.276	0.285	0.343	0.404
2016-04-11	0.28	0.261	0.344	0.404
2016-04-12	0.192	0.244	0.301	0.404
2016-04-13	0.213	0.246	0.296	0.367
2016-04-14	0.131	0.246	0.279	0.367
2016-04-15	0.129	0.235	0.278	0.359
2016-04-18	0.213	0.256	0.278	0.355
2016-04-19	0.21	0.252	0.275	0.354
2016-04-20	0.297	0.287	0.298	0.358
2016-04-21	0.244	0.251	0.296	0.36
2016-04-22	0.313	0.261	0.295	0.36
2016-04-25	0.303	0.26	0.295	0.359
2016-04-26	0.317	0.231	0.276	0.359
2016-04-27	0.181	0.23	0.276	0.346
2016-04-28	0.116	0.218	0.275	0.345
2016-04-29	0.064	0.218	0.254	0.345
2016-05-03	0.209	0.248	0.251	0.351
2016-05-04	0.211	0.247	0.241	0.349
2016-05-05	0.198	0.243	0.241	0.348
2016-05-06	0.339	0.267	0.255	0.354
2016-05-09	0.376	0.277	0.259	0.311
2016-05-10	0.253	0.267	0.259	0.311
2016-05-11	0.232	0.266	0.258	0.286
2016-05-12	0.244	0.228	0.255	0.281
2016-05-13	0.168	0.222	0.233	0.269
2016-05-16	0.162	0.224	0.239	0.271
2016-05-17	0.164	0.226	0.24	0.266
2016-05-18	0.228	0.237	0.231	0.268
2016-05-19	0.226	0.239	0.231	0.268
2016-05-20	0.217	0.242	0.226	0.265
2016-05-23	0.197	0.246	0.229	0.264
2016-05-24	0.199	0.21	0.226	0.264
2016-05-25	0.12	0.209	0.226	0.251
2016-05-26	0.118	0.209	0.223	0.251
2016-05-27	0.106	0.17	0.221	0.25
2016-05-30	0.064	0.143	0.221	0.237
2016-05-31	0.308	0.221	0.247	0.244
2016-06-01	0.291	0.217	0.247	0.238
2016-06-02	0.288	0.217	0.222	0.238
2016-06-03	0.28	0.211	0.218	0.238
2016-06-06	0.272	0.206	0.215	0.236
2016-06-07	0.095	0.209	0.215	0.236
2016-06-08	0.103	0.185	0.215	0.235
2016-06-13	0.434	0.32	0.277	0.268
2016-06-14	0.407	0.318	0.277	0.256
2016-06-15	0.507	0.337	0.29	0.264
2016-06-16	0.507	0.34	0.279	0.265
2016-06-17	0.514	0.339	0.279	0.258
2016-06-20	0.233	0.34	0.279	0.258
2016-06-21	0.261	0.344	0.267	0.255
2016-06-22	0.192	0.349	0.263	0.258
2016-06-23	0.164	0.303	0.263	0.257
2016-06-24	0.205	0.307	0.266	0.259
2016-06-27	0.279	0.326	0.275	0.264
2016-06-28	0.252	0.324	0.274	0.263
2016-06-29	0.24	0.324	0.271	0.264
2016-06-30	0.238	0.326	0.271	0.26
