# Supplementary material for: Policy Effectiveness Analysis of China’s Circuit Breaker Mechanism
Source: Hindawi journal article supplement (doi:10.1155/2020/9024723), 2020-09-28
Supplement: f1 [file 9024723.f1.zip › 9024723.f1/Data for material industry.xlsx]

## Sheet: file
	hv5	HV15	HV30	HV50
2015-07-01	0.8802	0.6687	0.6006	0.5289
2015-07-02	0.909	0.6945	0.6263	0.5445
2015-07-03	0.8442	0.7044	0.6463	0.5576
2015-07-06	0.8811	0.7056	0.6389	0.5494
2015-07-07	0.4746	0.7044	0.6362	0.5572
2015-07-08	0.4895	0.716	0.6476	0.5704
2015-07-09	0.88	0.7872	0.6774	0.5888
2015-07-10	0.9639	0.8762	0.69	0.6087
2015-07-13	1.0155	0.8806	0.7094	0.6198
2015-07-14	0.9804	0.8769	0.697	0.6221
2015-07-15	0.8989	0.8616	0.7007	0.6205
2015-07-16	0.8132	0.8717	0.7063	0.6209
2015-07-17	0.7323	0.8487	0.7232	0.6284
2015-07-20	0.6227	0.8324	0.7106	0.6262
2015-07-21	0.5514	0.7877	0.7125	0.6221
2015-07-22	0.3053	0.7583	0.7109	0.6214
2015-07-23	0.3296	0.721	0.722	0.6263
2015-07-24	0.2833	0.6646	0.7206	0.6246
2015-07-27	0.7378	0.77	0.7543	0.6537
2015-07-28	0.7091	0.7491	0.7542	0.654
2015-07-29	0.8529	0.7123	0.7677	0.6617
2015-07-30	0.7739	0.6874	0.764	0.6643
2015-07-31	0.8111	0.6279	0.7646	0.664
2015-08-03	0.5074	0.5949	0.7415	0.6623
2015-08-04	0.4761	0.5926	0.7473	0.6624
2015-08-05	0.4179	0.558	0.7389	0.6607
2015-08-06	0.3155	0.5555	0.7328	0.6574
2015-08-07	0.3277	0.526	0.6962	0.6411
2015-08-10	0.4338	0.5637	0.7011	0.6519
2015-08-11	0.4078	0.5641	0.6787	0.6434
2015-08-12	0.3969	0.5678	0.66	0.6417
2015-08-13	0.3564	0.562	0.6352	0.6455
2015-08-14	0.413	0.5596	0.6044	0.6446
2015-08-17	0.2973	0.3967	0.6073	0.6411
2015-08-18	0.6845	0.5316	0.6392	0.6629
2015-08-19	0.7472	0.5128	0.6108	0.6677
2015-08-20	0.7188	0.5085	0.5944	0.6696
2015-08-21	0.7534	0.5462	0.5786	0.6745
2015-08-24	0.7798	0.6575	0.6166	0.6999
2015-08-25	0.8192	0.7203	0.6608	0.7241
2015-08-26	0.4704	0.7305	0.659	0.7234
2015-08-27	0.8435	0.7641	0.6675	0.7282
2015-08-28	1.1382	0.8118	0.6775	0.7435
2015-08-31	0.9774	0.7692	0.6773	0.7259
2015-09-01	0.6442	0.7626	0.6756	0.7241
2015-09-02	0.4756	0.7637	0.6753	0.7187
2015-09-07	0.496	0.742	0.666	0.7155
2015-09-08	0.2383	0.7592	0.671	0.6948
2015-09-09	0.3205	0.7639	0.6314	0.693
2015-09-10	0.3951	0.7121	0.6335	0.6791
2015-09-11	0.3954	0.6863	0.6148	0.6692
2015-09-14	0.4649	0.6909	0.6173	0.6592
2015-09-15	0.5894	0.7184	0.6434	0.6622
2015-09-16	0.7941	0.7082	0.6714	0.6792
2015-09-17	0.8003	0.6149	0.6654	0.6756
2015-09-18	0.8053	0.5868	0.6654	0.6609
2015-09-21	0.8076	0.5696	0.67	0.6456
2015-09-22	0.5541	0.5056	0.6665	0.6258
2015-09-23	0.3557	0.5142	0.6465	0.6155
2015-09-24	0.2808	0.5183	0.646	0.6124
2015-09-25	0.3307	0.5231	0.6469	0.6057
2015-09-28	0.2852	0.521	0.6391	0.6036
2015-09-29	0.2945	0.5161	0.641	0.5943
2015-09-30	0.2763	0.4929	0.6334	0.5944
2015-10-08	0.4101	0.5209	0.6153	0.6009
2015-10-09	0.3945	0.5352	0.6113	0.6045
2015-10-12	0.4699	0.5468	0.6278	0.6091
2015-10-13	0.3451	0.4466	0.6171	0.6085
2015-10-14	0.3581	0.3704	0.5597	0.5769
2015-10-15	0.329	0.345	0.4945	0.5782
2015-10-16	0.3251	0.344	0.4752	0.5676
2015-10-19	0.1827	0.3412	0.4639	0.5636
2015-10-20	0.1594	0.341	0.4305	0.5631
2015-10-21	0.5182	0.4184	0.4659	0.576
2015-10-22	0.5595	0.4365	0.4769	0.5765
2015-10-23	0.5796	0.4246	0.4804	0.5784
2015-10-26	0.5797	0.4248	0.4764	0.5783
2015-10-27	0.5771	0.3973	0.4725	0.576
2015-10-28	0.3004	0.4087	0.4667	0.5639
2015-10-29	0.1993	0.3886	0.46	0.5628
2015-10-30	0.1296	0.3841	0.4608	0.5627
2015-11-02	0.1594	0.3485	0.4514	0.5594
2015-11-03	0.1697	0.3483	0.3978	0.5596
2015-11-04	0.4025	0.3962	0.3769	0.5673
2015-11-05	0.4065	0.3889	0.3628	0.5414
2015-11-06	0.3841	0.3932	0.3646	0.5375
2015-11-09	0.2726	0.3928	0.3621	0.5347
2015-11-10	0.2458	0.4026	0.3667	0.5291
2015-11-11	0.1942	0.2914	0.3563	0.487
2015-11-12	0.2065	0.2687	0.3562	0.4385
2015-11-13	0.3011	0.2915	0.3603	0.431
2015-11-16	0.3102	0.2934	0.3606	0.4236
2015-11-17	0.221	0.2945	0.3479	0.4024
2015-11-18	0.2306	0.2945	0.3529	0.4038
2015-11-19	0.2855	0.2999	0.3416	0.4052
2015-11-20	0.1957	0.2941	0.3362	0.4052
2015-11-23	0.2133	0.2842	0.3162	0.4038
2015-11-24	0.2128	0.2858	0.3157	0.4012
2015-11-25	0.1943	0.2262	0.317	0.3969
2015-11-26	0.1854	0.2275	0.3131	0.3928
2015-11-27	0.5122	0.348	0.3675	0.42
2015-11-30	0.5159	0.3464	0.3675	0.4109
2015-12-01	0.532	0.3298	0.3681	0.3772
2015-12-02	0.5628	0.3494	0.3263	0.3541
2015-12-03	0.5522	0.3518	0.3131	0.3454
2015-12-04	0.2477	0.3415	0.3131	0.3485
2015-12-07	0.2432	0.3393	0.3135	0.3465
2015-12-08	0.3311	0.3553	0.3236	0.3523
2015-12-09	0.25	0.3518	0.3207	0.3463
2015-12-10	0.2199	0.3427	0.321	0.3461
2015-12-11	0.2271	0.3436	0.3204	0.3421
2015-12-14	0.3508	0.3714	0.3275	0.3494
2015-12-15	0.2687	0.373	0.3291	0.3432
2015-12-16	0.2674	0.3692	0.3021	0.3432
2015-12-17	0.2585	0.3745	0.3055	0.3367
2015-12-18	0.2886	0.25	0.302	0.3335
2015-12-21	0.2183	0.2577	0.3068	0.3211
2015-12-22	0.186	0.2618	0.3023	0.3224
2015-12-23	0.3099	0.272	0.3095	0.3275
2015-12-24	0.2802	0.2708	0.3096	0.3239
2015-12-25	0.2721	0.2567	0.2984	0.3234
2015-12-28	0.2934	0.283	0.3074	0.3294
2015-12-29	0.2592	0.2573	0.3085	0.3296
2015-12-30	0.2199	0.2575	0.3053	0.298
2015-12-31	0.2254	0.2638	0.304	0.2906
2016-01-04	0.6043	0.4489	0.3928	0.3478
2016-01-05	0.6508	0.4238	0.394	0.3489
2016-01-06	0.8247	0.4923	0.4292	0.3717
2016-01-07	1.0252	0.6219	0.5053	0.4268
2016-01-08	1.1993	0.6743	0.5371	0.449
2016-01-11	1.0801	0.7019	0.5256	0.4635
2016-01-12	1.0717	0.6915	0.5263	0.4619
2016-01-13	0.9079	0.682	0.5271	0.4637
2016-01-14	0.6891	0.6963	0.5272	0.455
2016-01-15	0.4801	0.708	0.5383	0.4631
2016-01-18	0.3926	0.7069	0.5369	0.4607
2016-01-19	0.4748	0.7217	0.5441	0.4654
2016-01-20	0.4649	0.7174	0.5407	0.4618
2016-01-21	0.4468	0.7231	0.5486	0.4675
2016-01-22	0.3896	0.7308	0.551	0.469
2016-01-25	0.4025	0.655	0.5517	0.4672
2016-01-26	0.5124	0.6913	0.5644	0.4846
2016-01-27	0.5279	0.6308	0.5648	0.4847
2016-01-28	0.6095	0.5642	0.5841	0.5001
2016-01-29	0.6827	0.5073	0.59	0.5047
2016-02-01	0.6378	0.4813	0.5919	0.506
2016-02-02	0.5961	0.5019	0.5937	0.5099
2016-02-03	0.5942	0.5	0.5887	0.5098
2016-02-04	0.3941	0.5045	0.5976	0.5138
2016-02-05	0.3488	0.4803	0.5975	0.5122
2016-02-15	0.2277	0.4903	0.6023	0.4963
2016-02-16	0.2288	0.4867	0.6064	0.5
2016-02-17	0.1859	0.4855	0.6057	0.4996
2016-02-18	0.1742	0.4617	0.6056	0.4957
2016-02-19	0.2021	0.4588	0.6052	0.495
2016-02-22	0.2911	0.4842	0.5677	0.5027
2016-02-23	0.2737	0.3962	0.5666	0.5026
2016-02-24	0.2729	0.3962	0.541	0.5005
2016-02-25	0.6358	0.4254	0.5089	0.5229
2016-02-26	0.6772	0.423	0.4823	0.528
2016-02-29	0.6081	0.4149	0.4625	0.5286
2016-03-01	0.6689	0.4217	0.4719	0.5276
2016-03-02	0.8088	0.4713	0.5002	0.546
2016-03-03	0.485	0.4666	0.4953	0.5458
2016-03-04	0.4875	0.4659	0.4776	0.5436
2016-03-07	0.3882	0.4742	0.4852	0.549
2016-03-08	0.4453	0.4749	0.4808	0.5471
2016-03-09	0.4961	0.5382	0.5057	0.5575
2016-03-10	0.5045	0.547	0.4976	0.557
2016-03-11	0.5072	0.5459	0.4965	0.5573
2016-03-14	0.4637	0.5319	0.4999	0.5604
2016-03-15	0.4631	0.5339	0.4633	0.558
2016-03-16	0.2645	0.5323	0.4638	0.5574
2016-03-17	0.2319	0.4401	0.4253	0.5595
2016-03-18	0.2648	0.4363	0.4222	0.5624
2016-03-21	0.2503	0.4249	0.413	0.529
2016-03-22	0.241	0.417	0.4122	0.5287
2016-03-23	0.2079	0.3432	0.411	0.5132
2016-03-24	0.352	0.3682	0.4189	0.4719
2016-03-25	0.2885	0.3678	0.4193	0.4512
2016-03-28	0.2237	0.3385	0.4173	0.4357
2016-03-29	0.2249	0.3395	0.4146	0.4356
2016-03-30	0.3502	0.2833	0.4226	0.4386
2016-03-31	0.2538	0.2649	0.4225	0.4352
2016-04-01	0.2525	0.2663	0.4222	0.4239
2016-04-05	0.2422	0.257	0.4107	0.4247
2016-04-06	0.1917	0.2502	0.4107	0.4208
2016-04-07	0.152	0.2549	0.4115	0.42
2016-04-08	0.1514	0.2459	0.351	0.411
2016-04-11	0.2148	0.2463	0.3487	0.4135
2016-04-12	0.2058	0.2379	0.3418	0.413
2016-04-13	0.2623	0.2561	0.3401	0.3892
2016-04-14	0.2356	0.2582	0.2988	0.3896
2016-04-15	0.2666	0.2167	0.2999	0.3617
2016-04-18	0.2568	0.2278	0.3034	0.3589
2016-04-19	0.2652	0.226	0.2908	0.3524
2016-04-20	0.1755	0.2389	0.2956	0.3539
2016-04-21	0.2215	0.2138	0.2467	0.3538
2016-04-22	0.2805	0.2484	0.253	0.3565
2016-04-25	0.2757	0.2473	0.2544	0.3572
2016-04-26	0.2492	0.2402	0.2466	0.3553
2016-04-27	0.2298	0.2403	0.2443	0.3522
2016-04-28	0.1778	0.2396	0.2457	0.3531
2016-04-29	0.108	0.2413	0.2408	0.3532
2016-05-03	0.1884	0.236	0.2386	0.3555
2016-05-04	0.2096	0.2382	0.2351	0.347
2016-05-05	0.2074	0.2008	0.2337	0.3469
2016-05-06	0.332	0.2379	0.2534	0.3552
2016-05-09	0.4428	0.2969	0.2754	0.336
2016-05-10	0.3292	0.2958	0.2758	0.3302
2016-05-11	0.37	0.2913	0.2764	0.3273
2016-05-12	0.3962	0.2934	0.2761	0.3205
2016-05-13	0.3666	0.2847	0.2602	0.2907
2016-05-16	0.1365	0.2838	0.2653	0.2932
2016-05-17	0.1094	0.2836	0.263	0.2931
2016-05-18	0.2276	0.2927	0.2653	0.2872
2016-05-19	0.2396	0.3015	0.269	0.2887
2016-05-20	0.2395	0.3014	0.2682	0.2618
2016-05-23	0.2062	0.2998	0.2684	0.2577
2016-05-24	0.2203	0.2799	0.2574	0.2588
2016-05-25	0.1476	0.2795	0.2571	0.2536
2016-05-26	0.1351	0.2859	0.243	0.2537
2016-05-27	0.1334	0.2547	0.2432	0.2535
2016-05-30	0.1271	0.1565	0.2429	0.2498
2016-05-31	0.3029	0.2222	0.2723	0.2602
2016-06-01	0.2823	0.2223	0.2709	0.2575
2016-06-02	0.2841	0.2217	0.2667	0.2572
2016-06-03	0.2815	0.2217	0.264	0.2566
2016-06-06	0.2568	0.2152	0.2532	0.2473
2016-06-07	0.0809	0.2173	0.2528	0.2475
2016-06-08	0.1106	0.1964	0.2541	0.2483
2016-06-13	0.1989	0.2263	0.2647	0.2542
2016-06-14	0.1992	0.2262	0.2636	0.2446
2016-06-15	0.3168	0.2533	0.2764	0.2532
2016-06-16	0.3306	0.2484	0.2709	0.2535
2016-06-17	0.318	0.2456	0.2699	0.2516
2016-06-20	0.2175	0.2479	0.2704	0.252
2016-06-21	0.2404	0.2516	0.2522	0.2515
2016-06-22	0.1509	0.2519	0.2078	0.2527
2016-06-23	0.1372	0.199	0.2088	0.2468
2016-06-24	0.1356	0.1977	0.2087	0.2468
2016-06-27	0.164	0.203	0.2102	0.2398
2016-06-28	0.1451	0.203	0.2103	0.2397
2016-06-29	0.1273	0.2022	0.2062	0.2397
2016-06-30	0.1106	0.2026	0.2072	0.2382
