# Supplementary material for: Policy Effectiveness Analysis of China’s Circuit Breaker Mechanism
Source: Hindawi journal article supplement (doi:10.1155/2020/9024723), 2020-09-28
Supplement: f1 [file 9024723.f1.zip › 9024723.f1/Data for pharmaceutical industry.xlsx]

## Sheet: file
	HV5	HV15	HV30	HV50
2015-07-01	1.024	0.686	0.597	0.499
2015-07-02	1.014	0.686	0.61	0.501
2015-07-03	0.834	0.674	0.601	0.502
2015-07-06	0.825	0.685	0.604	0.505
2015-07-07	0.535	0.719	0.623	0.528
2015-07-08	0.58	0.739	0.635	0.543
2015-07-09	0.915	0.815	0.67	0.562
2015-07-10	1.084	0.894	0.687	0.585
2015-07-13	1.163	0.923	0.706	0.602
2015-07-14	0.944	0.904	0.681	0.603
2015-07-15	0.972	0.931	0.701	0.62
2015-07-16	0.91	0.928	0.709	0.624
2015-07-17	0.829	0.873	0.726	0.631
2015-07-20	0.695	0.855	0.726	0.629
2015-07-21	0.695	0.788	0.727	0.625
2015-07-22	0.36	0.777	0.727	0.625
2015-07-23	0.357	0.756	0.729	0.628
2015-07-24	0.275	0.748	0.728	0.629
2015-07-27	0.729	0.845	0.768	0.661
2015-07-28	0.768	0.793	0.773	0.662
2015-07-29	0.854	0.745	0.783	0.666
2015-07-30	0.836	0.737	0.789	0.672
2015-07-31	0.881	0.68	0.788	0.668
2015-08-03	0.497	0.628	0.776	0.668
2015-08-04	0.519	0.644	0.774	0.669
2015-08-05	0.513	0.581	0.775	0.669
2015-08-06	0.383	0.575	0.762	0.668
2015-08-07	0.372	0.543	0.715	0.653
2015-08-10	0.447	0.569	0.714	0.655
2015-08-11	0.412	0.57	0.676	0.64
2015-08-12	0.416	0.579	0.673	0.641
2015-08-13	0.393	0.567	0.659	0.641
2015-08-14	0.384	0.563	0.653	0.641
2015-08-17	0.259	0.396	0.652	0.643
2015-08-18	0.429	0.448	0.633	0.651
2015-08-19	0.477	0.435	0.605	0.655
2015-08-20	0.556	0.432	0.594	0.658
2015-08-21	0.62	0.472	0.577	0.664
2015-08-24	0.746	0.613	0.614	0.698
2015-08-25	0.787	0.634	0.648	0.715
2015-08-26	0.705	0.649	0.627	0.716
2015-08-27	1.029	0.708	0.642	0.728
2015-08-28	1.14	0.738	0.641	0.735
2015-08-31	0.83	0.705	0.641	0.726
2015-09-01	0.5	0.705	0.64	0.719
2015-09-02	0.506	0.708	0.641	0.719
2015-09-07	0.416	0.704	0.634	0.711
2015-09-08	0.4	0.738	0.65	0.69
2015-09-09	0.397	0.735	0.597	0.686
2015-09-10	0.357	0.715	0.592	0.66
2015-09-11	0.385	0.697	0.579	0.657
2015-09-14	0.428	0.689	0.572	0.652
2015-09-15	0.339	0.681	0.578	0.656
2015-09-16	0.672	0.614	0.612	0.672
2015-09-17	0.698	0.529	0.605	0.657
2015-09-18	0.701	0.527	0.604	0.642
2015-09-21	0.693	0.489	0.608	0.626
2015-09-22	0.564	0.452	0.606	0.604
2015-09-23	0.323	0.458	0.592	0.586
2015-09-24	0.231	0.453	0.594	0.587
2015-09-25	0.312	0.465	0.594	0.57
2015-09-28	0.268	0.461	0.594	0.567
2015-09-29	0.278	0.43	0.596	0.557
2015-09-30	0.282	0.426	0.592	0.557
2015-10-08	0.477	0.478	0.6	0.569
2015-10-09	0.408	0.477	0.593	0.569
2015-10-12	0.422	0.47	0.589	0.569
2015-10-13	0.322	0.424	0.571	0.568
2015-10-14	0.383	0.337	0.487	0.53
2015-10-15	0.242	0.313	0.427	0.529
2015-10-16	0.244	0.313	0.426	0.521
2015-10-19	0.183	0.305	0.401	0.513
2015-10-20	0.186	0.306	0.381	0.511
2015-10-21	0.309	0.328	0.392	0.514
2015-10-22	0.394	0.356	0.402	0.515
2015-10-23	0.439	0.347	0.411	0.519
2015-10-26	0.441	0.348	0.407	0.518
2015-10-27	0.451	0.323	0.39	0.517
2015-10-28	0.409	0.352	0.397	0.51
2015-10-29	0.333	0.305	0.398	0.511
2015-10-30	0.221	0.31	0.396	0.509
2015-11-02	0.228	0.307	0.39	0.51
2015-11-03	0.224	0.31	0.367	0.51
2015-11-04	0.397	0.351	0.339	0.519
2015-11-05	0.391	0.346	0.324	0.507
2015-11-06	0.383	0.348	0.325	0.504
2015-11-09	0.327	0.348	0.322	0.496
2015-11-10	0.334	0.352	0.324	0.483
2015-11-11	0.155	0.317	0.318	0.422
2015-11-12	0.149	0.286	0.318	0.38
2015-11-13	0.233	0.276	0.315	0.384
2015-11-16	0.251	0.282	0.316	0.368
2015-11-17	0.236	0.281	0.305	0.355
2015-11-18	0.233	0.268	0.311	0.356
2015-11-19	0.264	0.269	0.284	0.354
2015-11-20	0.192	0.266	0.284	0.354
2015-11-23	0.166	0.253	0.277	0.351
2015-11-24	0.166	0.248	0.277	0.339
2015-11-25	0.114	0.176	0.274	0.339
2015-11-26	0.121	0.182	0.272	0.34
2015-11-27	0.334	0.25	0.302	0.353
2015-11-30	0.336	0.248	0.302	0.347
2015-12-01	0.382	0.259	0.305	0.333
2015-12-02	0.395	0.262	0.291	0.301
2015-12-03	0.394	0.262	0.272	0.291
2015-12-04	0.157	0.245	0.257	0.292
2015-12-07	0.178	0.254	0.264	0.292
2015-12-08	0.238	0.262	0.267	0.295
2015-12-09	0.216	0.255	0.257	0.291
2015-12-10	0.215	0.248	0.255	0.291
2015-12-11	0.216	0.25	0.254	0.284
2015-12-14	0.145	0.252	0.25	0.284
2015-12-15	0.097	0.252	0.248	0.278
2015-12-16	0.101	0.248	0.212	0.279
2015-12-17	0.169	0.257	0.219	0.261
2015-12-18	0.149	0.17	0.216	0.261
2015-12-21	0.308	0.23	0.246	0.271
2015-12-22	0.315	0.228	0.244	0.271
2015-12-23	0.308	0.225	0.242	0.269
2015-12-24	0.358	0.242	0.249	0.271
2015-12-25	0.359	0.239	0.239	0.271
2015-12-28	0.129	0.234	0.24	0.273
2015-12-29	0.17	0.226	0.241	0.273
2015-12-30	0.174	0.225	0.237	0.262
2015-12-31	0.128	0.225	0.233	0.249
2016-01-04	0.558	0.399	0.328	0.298
2016-01-05	0.564	0.395	0.328	0.298
2016-01-06	0.579	0.402	0.331	0.3
2016-01-07	0.713	0.508	0.397	0.344
2016-01-08	0.802	0.516	0.407	0.348
2016-01-11	0.708	0.545	0.415	0.366
2016-01-12	0.745	0.508	0.418	0.366
2016-01-13	0.701	0.509	0.419	0.371
2016-01-14	0.557	0.533	0.423	0.36
2016-01-15	0.511	0.536	0.428	0.365
2016-01-18	0.391	0.542	0.43	0.364
2016-01-19	0.45	0.571	0.436	0.372
2016-01-20	0.418	0.567	0.437	0.373
2016-01-21	0.424	0.569	0.443	0.376
2016-01-22	0.382	0.572	0.443	0.376
2016-01-25	0.394	0.503	0.447	0.376
2016-01-26	0.393	0.528	0.46	0.386
2016-01-27	0.406	0.521	0.461	0.386
2016-01-28	0.383	0.429	0.462	0.387
2016-01-29	0.468	0.433	0.468	0.392
2016-02-01	0.435	0.383	0.467	0.392
2016-02-02	0.317	0.388	0.452	0.395
2016-02-03	0.318	0.374	0.452	0.395
2016-02-04	0.236	0.36	0.455	0.395
2016-02-05	0.179	0.342	0.454	0.395
2016-02-15	0.148	0.339	0.454	0.385
2016-02-16	0.182	0.329	0.463	0.39
2016-02-17	0.187	0.321	0.462	0.387
2016-02-18	0.201	0.295	0.461	0.385
2016-02-19	0.197	0.295	0.462	0.384
2016-02-22	0.201	0.294	0.41	0.386
2016-02-23	0.137	0.214	0.41	0.382
2016-02-24	0.137	0.213	0.408	0.382
2016-02-25	0.463	0.327	0.38	0.403
2016-02-26	0.48	0.308	0.373	0.404
2016-02-29	0.465	0.336	0.354	0.409
2016-03-01	0.507	0.328	0.353	0.41
2016-03-02	0.608	0.36	0.361	0.419
2016-03-03	0.389	0.357	0.353	0.419
2016-03-04	0.389	0.358	0.344	0.416
2016-03-07	0.234	0.359	0.343	0.416
2016-03-08	0.238	0.342	0.33	0.404
2016-03-09	0.095	0.343	0.326	0.404
2016-03-10	0.156	0.349	0.319	0.405
2016-03-11	0.157	0.347	0.319	0.404
2016-03-14	0.233	0.356	0.322	0.408
2016-03-15	0.233	0.356	0.292	0.407
2016-03-16	0.224	0.356	0.292	0.407
2016-03-17	0.15	0.253	0.288	0.409
2016-03-18	0.125	0.252	0.278	0.41
2016-03-21	0.088	0.198	0.278	0.373
2016-03-22	0.153	0.206	0.275	0.374
2016-03-23	0.162	0.161	0.275	0.372
2016-03-24	0.176	0.171	0.276	0.328
2016-03-25	0.171	0.171	0.276	0.323
2016-03-28	0.127	0.17	0.276	0.301
2016-03-29	0.16	0.186	0.271	0.302
2016-03-30	0.276	0.211	0.282	0.302
2016-03-31	0.258	0.193	0.282	0.297
2016-04-01	0.257	0.194	0.282	0.29
2016-04-05	0.276	0.185	0.283	0.291
2016-04-06	0.217	0.185	0.282	0.282
2016-04-07	0.151	0.194	0.283	0.28
2016-04-08	0.163	0.191	0.221	0.273
2016-04-11	0.19	0.194	0.222	0.274
2016-04-12	0.149	0.187	0.196	0.272
2016-04-13	0.16	0.184	0.195	0.251
2016-04-14	0.14	0.185	0.171	0.251
2016-04-15	0.108	0.177	0.171	0.246
2016-04-18	0.11	0.181	0.174	0.24
2016-04-19	0.106	0.181	0.173	0.239
2016-04-20	0.181	0.195	0.187	0.241
2016-04-21	0.151	0.159	0.189	0.243
2016-04-22	0.176	0.161	0.181	0.242
2016-04-25	0.178	0.161	0.181	0.242
2016-04-26	0.221	0.156	0.174	0.243
2016-04-27	0.141	0.156	0.174	0.236
2016-04-28	0.096	0.151	0.174	0.236
2016-04-29	0.095	0.148	0.168	0.236
2016-05-03	0.179	0.173	0.181	0.242
2016-05-04	0.179	0.173	0.177	0.24
2016-05-05	0.18	0.171	0.175	0.24
2016-05-06	0.279	0.195	0.189	0.246
2016-05-09	0.292	0.2	0.19	0.207
2016-05-10	0.163	0.197	0.188	0.206
2016-05-11	0.286	0.226	0.202	0.198
2016-05-12	0.285	0.204	0.196	0.197
2016-05-13	0.221	0.198	0.178	0.182
2016-05-16	0.197	0.201	0.181	0.183
2016-05-17	0.193	0.201	0.181	0.183
2016-05-18	0.12	0.2	0.177	0.184
2016-05-19	0.121	0.201	0.177	0.184
2016-05-20	0.127	0.202	0.176	0.184
2016-05-23	0.089	0.202	0.174	0.179
2016-05-24	0.091	0.17	0.17	0.179
2016-05-25	0.082	0.172	0.171	0.174
2016-05-26	0.087	0.173	0.17	0.174
2016-05-27	0.076	0.143	0.169	0.174
2016-05-30	0.069	0.136	0.169	0.171
2016-05-31	0.243	0.182	0.189	0.182
2016-06-01	0.228	0.153	0.189	0.179
2016-06-02	0.229	0.152	0.177	0.178
2016-06-03	0.228	0.161	0.177	0.181
2016-06-06	0.21	0.156	0.177	0.179
2016-06-07	0.1	0.155	0.177	0.178
2016-06-08	0.107	0.149	0.174	0.178
2016-06-13	0.254	0.195	0.195	0.187
2016-06-14	0.218	0.195	0.195	0.176
2016-06-15	0.256	0.203	0.199	0.179
2016-06-16	0.254	0.205	0.186	0.179
2016-06-17	0.28	0.206	0.189	0.178
2016-06-20	0.134	0.206	0.189	0.178
2016-06-21	0.15	0.206	0.175	0.177
2016-06-22	0.151	0.209	0.175	0.178
2016-06-23	0.13	0.174	0.175	0.176
2016-06-24	0.136	0.178	0.163	0.177
2016-06-27	0.182	0.191	0.169	0.18
2016-06-28	0.201	0.199	0.178	0.185
2016-06-29	0.204	0.2	0.176	0.185
2016-06-30	0.195	0.2	0.176	0.184
