# Supplementary material for: Policy Effectiveness Analysis of China’s Circuit Breaker Mechanism
Source: Hindawi journal article supplement (doi:10.1155/2020/9024723), 2020-09-28
Supplement: f1 [file 9024723.f1.zip › 9024723.f1/Data for public industry.xlsx]

## Sheet: file
	HV5	HV15	HV30	HV50
2015-07-01	0.665	0.652	0.591	0.587
2015-07-02	0.714	0.697	0.627	0.608
2015-07-03	0.692	0.734	0.657	0.615
2015-07-06	0.724	0.714	0.649	0.615
2015-07-07	0.501	0.711	0.639	0.616
2015-07-08	0.529	0.739	0.663	0.634
2015-07-09	0.89	0.755	0.688	0.649
2015-07-10	0.934	0.833	0.697	0.666
2015-07-13	0.996	0.859	0.72	0.676
2015-07-14	0.993	0.844	0.691	0.658
2015-07-15	0.974	0.83	0.708	0.663
2015-07-16	0.897	0.846	0.712	0.66
2015-07-17	0.813	0.83	0.724	0.648
2015-07-20	0.669	0.831	0.717	0.646
2015-07-21	0.654	0.817	0.713	0.64
2015-07-22	0.244	0.787	0.711	0.631
2015-07-23	0.239	0.734	0.713	0.629
2015-07-24	0.131	0.665	0.712	0.629
2015-07-27	0.59	0.744	0.734	0.648
2015-07-28	0.587	0.737	0.734	0.648
2015-07-29	0.7	0.677	0.743	0.653
2015-07-30	0.692	0.65	0.723	0.656
2015-07-31	0.701	0.592	0.72	0.655
2015-08-03	0.416	0.54	0.706	0.652
2015-08-04	0.429	0.547	0.704	0.649
2015-08-05	0.381	0.468	0.685	0.649
2015-08-06	0.315	0.464	0.685	0.646
2015-08-07	0.33	0.439	0.656	0.631
2015-08-10	0.418	0.471	0.668	0.639
2015-08-11	0.397	0.471	0.662	0.619
2015-08-12	0.332	0.47	0.638	0.615
2015-08-13	0.315	0.481	0.61	0.618
2015-08-14	0.324	0.48	0.57	0.618
2015-08-17	0.219	0.337	0.571	0.615
2015-08-18	0.641	0.481	0.612	0.634
2015-08-19	0.659	0.451	0.569	0.634
2015-08-20	0.608	0.446	0.548	0.634
2015-08-21	0.609	0.476	0.528	0.639
2015-08-24	0.595	0.553	0.538	0.653
2015-08-25	0.563	0.582	0.565	0.666
2015-08-26	0.391	0.58	0.534	0.662
2015-08-27	0.715	0.618	0.544	0.655
2015-08-28	0.888	0.65	0.548	0.664
2015-08-31	0.731	0.624	0.551	0.654
2015-09-01	0.399	0.63	0.553	0.65
2015-09-02	0.234	0.639	0.555	0.64
2015-09-07	0.456	0.628	0.559	0.643
2015-09-08	0.373	0.641	0.565	0.625
2015-09-09	0.366	0.639	0.523	0.626
2015-09-10	0.4	0.574	0.526	0.622
2015-09-11	0.368	0.567	0.508	0.608
2015-09-14	0.339	0.569	0.509	0.592
2015-09-15	0.305	0.567	0.517	0.577
2015-09-16	0.549	0.535	0.538	0.588
2015-09-17	0.55	0.461	0.533	0.588
2015-09-18	0.549	0.454	0.53	0.565
2015-09-21	0.522	0.428	0.53	0.547
2015-09-22	0.446	0.385	0.527	0.525
2015-09-23	0.186	0.391	0.513	0.51
2015-09-24	0.209	0.385	0.514	0.509
2015-09-25	0.223	0.375	0.515	0.488
2015-09-28	0.224	0.359	0.504	0.485
2015-09-29	0.229	0.338	0.504	0.476
2015-09-30	0.187	0.33	0.499	0.476
2015-10-08	0.305	0.358	0.47	0.481
2015-10-09	0.259	0.362	0.467	0.48
2015-10-12	0.325	0.378	0.478	0.486
2015-10-13	0.246	0.346	0.466	0.485
2015-10-14	0.32	0.274	0.419	0.458
2015-10-15	0.301	0.281	0.376	0.461
2015-10-16	0.303	0.284	0.373	0.45
2015-10-19	0.229	0.284	0.357	0.447
2015-10-20	0.222	0.28	0.333	0.447
2015-10-21	0.433	0.323	0.356	0.456
2015-10-22	0.423	0.331	0.358	0.454
2015-10-23	0.416	0.318	0.356	0.452
2015-10-26	0.415	0.317	0.342	0.452
2015-10-27	0.41	0.305	0.335	0.45
2015-10-28	0.168	0.309	0.333	0.439
2015-10-29	0.114	0.292	0.329	0.439
2015-10-30	0.088	0.294	0.329	0.439
2015-11-02	0.108	0.271	0.323	0.434
2015-11-03	0.112	0.271	0.306	0.434
2015-11-04	0.321	0.303	0.288	0.441
2015-11-05	0.341	0.3	0.286	0.413
2015-11-06	0.321	0.297	0.286	0.412
2015-11-09	0.23	0.299	0.287	0.41
2015-11-10	0.27	0.303	0.287	0.401
2015-11-11	0.168	0.215	0.271	0.366
2015-11-12	0.146	0.21	0.272	0.334
2015-11-13	0.132	0.208	0.264	0.331
2015-11-16	0.129	0.22	0.27	0.322
2015-11-17	0.158	0.221	0.263	0.306
2015-11-18	0.165	0.227	0.268	0.305
2015-11-19	0.186	0.228	0.258	0.304
2015-11-20	0.185	0.227	0.258	0.302
2015-11-23	0.163	0.218	0.243	0.293
2015-11-24	0.127	0.218	0.243	0.287
2015-11-25	0.105	0.158	0.238	0.286
2015-11-26	0.076	0.137	0.231	0.283
2015-11-27	0.329	0.229	0.266	0.302
2015-11-30	0.384	0.236	0.27	0.298
2015-12-01	0.387	0.236	0.27	0.287
2015-12-02	0.482	0.28	0.251	0.274
2015-12-03	0.48	0.28	0.246	0.27
2015-12-04	0.307	0.289	0.251	0.273
2015-12-07	0.303	0.284	0.25	0.273
2015-12-08	0.343	0.287	0.256	0.275
2015-12-09	0.166	0.284	0.255	0.267
2015-12-10	0.139	0.281	0.256	0.268
2015-12-11	0.115	0.281	0.256	0.264
2015-12-14	0.263	0.304	0.263	0.27
2015-12-15	0.224	0.305	0.263	0.267
2015-12-16	0.224	0.304	0.239	0.267
2015-12-17	0.228	0.313	0.237	0.263
2015-12-18	0.212	0.236	0.236	0.262
2015-12-21	0.184	0.241	0.241	0.256
2015-12-22	0.163	0.242	0.239	0.256
2015-12-23	0.17	0.199	0.239	0.253
2015-12-24	0.18	0.203	0.24	0.25
2015-12-25	0.18	0.187	0.24	0.248
2015-12-28	0.128	0.203	0.242	0.251
2015-12-29	0.146	0.187	0.24	0.251
2015-12-30	0.147	0.188	0.238	0.227
2015-12-31	0.141	0.184	0.236	0.223
2016-01-04	0.476	0.342	0.307	0.27
2016-01-05	0.499	0.32	0.308	0.27
2016-01-06	0.559	0.34	0.317	0.276
2016-01-07	0.695	0.437	0.372	0.316
2016-01-08	0.768	0.447	0.382	0.322
2016-01-11	0.686	0.475	0.381	0.337
2016-01-12	0.687	0.462	0.378	0.336
2016-01-13	0.605	0.462	0.381	0.339
2016-01-14	0.471	0.476	0.369	0.33
2016-01-15	0.433	0.489	0.38	0.335
2016-01-18	0.348	0.488	0.378	0.334
2016-01-19	0.433	0.514	0.391	0.34
2016-01-20	0.4	0.513	0.389	0.34
2016-01-21	0.424	0.519	0.397	0.345
2016-01-22	0.339	0.523	0.398	0.346
2016-01-25	0.339	0.461	0.399	0.346
2016-01-26	0.531	0.528	0.432	0.377
2016-01-27	0.509	0.504	0.433	0.375
2016-01-28	0.505	0.447	0.436	0.378
2016-01-29	0.584	0.449	0.442	0.384
2016-02-01	0.559	0.421	0.441	0.384
2016-02-02	0.368	0.433	0.44	0.388
2016-02-03	0.348	0.429	0.44	0.388
2016-02-04	0.234	0.425	0.445	0.39
2016-02-05	0.199	0.402	0.445	0.39
2016-02-15	0.21	0.403	0.444	0.378
2016-02-16	0.295	0.412	0.46	0.385
2016-02-17	0.289	0.415	0.461	0.386
2016-02-18	0.285	0.398	0.462	0.376
2016-02-19	0.276	0.396	0.461	0.376
2016-02-22	0.233	0.406	0.428	0.378
2016-02-23	0.144	0.269	0.428	0.378
2016-02-24	0.182	0.265	0.426	0.381
2016-02-25	0.536	0.363	0.416	0.403
2016-02-26	0.554	0.352	0.411	0.405
2016-02-29	0.558	0.381	0.402	0.411
2016-03-01	0.599	0.381	0.406	0.409
2016-03-02	0.671	0.414	0.421	0.421
2016-03-03	0.439	0.411	0.418	0.421
2016-03-04	0.436	0.41	0.404	0.419
2016-03-07	0.246	0.404	0.404	0.42
2016-03-08	0.273	0.384	0.395	0.416
2016-03-09	0.114	0.386	0.396	0.416
2016-03-10	0.161	0.393	0.389	0.417
2016-03-11	0.162	0.394	0.389	0.418
2016-03-14	0.221	0.392	0.393	0.421
2016-03-15	0.244	0.397	0.333	0.422
2016-03-16	0.216	0.388	0.329	0.422
2016-03-17	0.093	0.274	0.316	0.422
2016-03-18	0.089	0.272	0.31	0.424
2016-03-21	0.074	0.211	0.309	0.397
2016-03-22	0.089	0.208	0.306	0.397
2016-03-23	0.114	0.151	0.306	0.393
2016-03-24	0.174	0.166	0.308	0.362
2016-03-25	0.168	0.167	0.307	0.358
2016-03-28	0.122	0.169	0.305	0.342
2016-03-29	0.123	0.171	0.292	0.342
2016-03-30	0.236	0.184	0.299	0.343
2016-03-31	0.202	0.162	0.299	0.341
2016-04-01	0.199	0.162	0.298	0.329
2016-04-05	0.192	0.154	0.295	0.33
2016-04-06	0.18	0.151	0.296	0.324
2016-04-07	0.131	0.163	0.293	0.325
2016-04-08	0.146	0.168	0.225	0.318
2016-04-11	0.181	0.171	0.225	0.319
2016-04-12	0.153	0.162	0.195	0.319
2016-04-13	0.202	0.174	0.193	0.275
2016-04-14	0.172	0.173	0.161	0.272
2016-04-15	0.148	0.163	0.162	0.264
2016-04-18	0.161	0.169	0.166	0.26
2016-04-19	0.156	0.168	0.165	0.258
2016-04-20	0.165	0.188	0.177	0.261
2016-04-21	0.143	0.162	0.178	0.262
2016-04-22	0.171	0.164	0.169	0.261
2016-04-25	0.173	0.163	0.169	0.261
2016-04-26	0.17	0.155	0.162	0.258
2016-04-27	0.099	0.155	0.156	0.248
2016-04-28	0.041	0.149	0.156	0.248
2016-04-29	0.03	0.145	0.155	0.248
2016-05-03	0.11	0.147	0.158	0.249
2016-05-04	0.113	0.146	0.152	0.246
2016-05-05	0.112	0.129	0.152	0.246
2016-05-06	0.194	0.147	0.162	0.246
2016-05-09	0.238	0.164	0.169	0.206
2016-05-10	0.192	0.165	0.167	0.204
2016-05-11	0.207	0.165	0.168	0.187
2016-05-12	0.264	0.166	0.174	0.186
2016-05-13	0.225	0.161	0.159	0.165
2016-05-16	0.132	0.161	0.16	0.165
2016-05-17	0.151	0.162	0.16	0.165
2016-05-18	0.157	0.162	0.156	0.165
2016-05-19	0.066	0.162	0.156	0.165
2016-05-20	0.074	0.164	0.154	0.163
2016-05-23	0.069	0.164	0.152	0.159
2016-05-24	0.056	0.15	0.147	0.158
2016-05-25	0.046	0.15	0.146	0.153
2016-05-26	0.038	0.15	0.138	0.15
2016-05-27	0.023	0.127	0.136	0.149
2016-05-30	0.013	0.09	0.136	0.148
2016-05-31	0.191	0.138	0.156	0.158
2016-06-01	0.194	0.139	0.156	0.155
2016-06-02	0.192	0.123	0.144	0.155
2016-06-03	0.186	0.123	0.142	0.156
2016-06-06	0.194	0.124	0.142	0.153
2016-06-07	0.08	0.12	0.142	0.152
2016-06-08	0.074	0.117	0.142	0.152
2016-06-13	0.188	0.154	0.157	0.159
2016-06-14	0.159	0.153	0.156	0.149
2016-06-15	0.192	0.158	0.159	0.151
2016-06-16	0.192	0.159	0.153	0.151
2016-06-17	0.195	0.159	0.154	0.149
2016-06-20	0.075	0.159	0.154	0.149
2016-06-21	0.078	0.159	0.142	0.147
2016-06-22	0.067	0.161	0.128	0.147
2016-06-23	0.098	0.126	0.131	0.145
2016-06-24	0.125	0.134	0.136	0.147
2016-06-27	0.139	0.137	0.128	0.143
2016-06-28	0.14	0.131	0.127	0.143
2016-06-29	0.139	0.135	0.128	0.144
2016-06-30	0.122	0.135	0.127	0.142
