# Supplementary material for: Policy Effectiveness Analysis of China’s Circuit Breaker Mechanism
Source: Hindawi journal article supplement (doi:10.1155/2020/9024723), 2020-09-28
Supplement: f1 [file 9024723.f1.zip › 9024723.f1/Data for telecommunications industry.xlsx]

## Sheet: file
	HV5	HV15	HV30	HV50
2015-07-01	1.213	0.876	0.714	0.643
2015-07-02	1.2	0.873	0.716	0.639
2015-07-03	1.042	0.881	0.72	0.652
2015-07-06	0.933	0.902	0.728	0.645
2015-07-07	0.562	0.905	0.726	0.652
2015-07-08	0.673	0.915	0.742	0.662
2015-07-09	0.92	0.939	0.766	0.674
2015-07-10	0.955	0.973	0.775	0.682
2015-07-13	0.914	0.922	0.775	0.681
2015-07-14	0.832	0.899	0.76	0.679
2015-07-15	0.423	0.881	0.745	0.657
2015-07-16	0.326	0.873	0.748	0.658
2015-07-17	0.441	0.821	0.78	0.673
2015-07-20	0.419	0.757	0.785	0.669
2015-07-21	0.348	0.664	0.787	0.667
2015-07-22	0.308	0.665	0.791	0.665
2015-07-23	0.266	0.663	0.803	0.671
2015-07-24	0.291	0.602	0.803	0.672
2015-07-27	0.856	0.734	0.84	0.7
2015-07-28	0.823	0.702	0.834	0.7
2015-07-29	0.969	0.631	0.841	0.714
2015-07-30	0.902	0.642	0.838	0.717
2015-07-31	0.9	0.628	0.827	0.712
2015-08-03	0.641	0.645	0.793	0.714
2015-08-04	0.782	0.684	0.807	0.724
2015-08-05	0.629	0.699	0.802	0.723
2015-08-06	0.6	0.705	0.791	0.722
2015-08-07	0.651	0.669	0.737	0.719
2015-08-10	0.72	0.726	0.729	0.74
2015-08-11	0.653	0.722	0.681	0.733
2015-08-12	0.577	0.716	0.679	0.726
2015-08-13	0.494	0.699	0.673	0.727
2015-08-14	0.494	0.699	0.646	0.727
2015-08-17	0.101	0.558	0.642	0.728
2015-08-18	0.805	0.723	0.701	0.761
2015-08-19	0.937	0.704	0.666	0.77
2015-08-20	0.934	0.688	0.655	0.771
2015-08-21	0.994	0.733	0.672	0.781
2015-08-24	1.101	0.838	0.737	0.809
2015-08-25	1.089	0.879	0.794	0.832
2015-08-26	0.731	0.89	0.805	0.826
2015-08-27	1.109	0.955	0.832	0.84
2015-08-28	1.415	1.008	0.844	0.856
2015-08-31	1.231	0.952	0.841	0.835
2015-09-01	0.89	0.951	0.839	0.831
2015-09-02	0.723	0.95	0.835	0.827
2015-09-07	0.693	0.945	0.826	0.822
2015-09-08	0.372	0.954	0.831	0.791
2015-09-09	0.417	0.965	0.794	0.775
2015-09-10	0.408	0.879	0.795	0.747
2015-09-11	0.401	0.841	0.769	0.746
2015-09-14	0.438	0.841	0.77	0.748
2015-09-15	0.542	0.843	0.787	0.749
2015-09-16	0.765	0.811	0.81	0.761
2015-09-17	0.771	0.697	0.79	0.755
2015-09-18	0.785	0.658	0.788	0.733
2015-09-21	0.793	0.612	0.796	0.729
2015-09-22	0.533	0.52	0.79	0.722
2015-09-23	0.42	0.524	0.757	0.724
2015-09-24	0.347	0.52	0.758	0.725
2015-09-25	0.374	0.521	0.758	0.725
2015-09-28	0.26	0.507	0.756	0.724
2015-09-29	0.256	0.506	0.756	0.711
2015-09-30	0.243	0.491	0.756	0.709
2015-10-08	0.384	0.515	0.71	0.712
2015-10-09	0.374	0.519	0.693	0.711
2015-10-12	0.442	0.52	0.706	0.712
2015-10-13	0.294	0.429	0.686	0.712
2015-10-14	0.339	0.355	0.619	0.68
2015-10-15	0.379	0.367	0.552	0.688
2015-10-16	0.385	0.367	0.525	0.673
2015-10-19	0.404	0.371	0.498	0.67
2015-10-20	0.469	0.399	0.462	0.676
2015-10-21	0.576	0.41	0.472	0.677
2015-10-22	0.5	0.417	0.471	0.665
2015-10-23	0.499	0.407	0.469	0.663
2015-10-26	0.466	0.411	0.46	0.662
2015-10-27	0.344	0.38	0.457	0.657
2015-10-28	0.267	0.4	0.456	0.637
2015-10-29	0.188	0.381	0.451	0.637
2015-10-30	0.175	0.383	0.451	0.637
2015-11-02	0.29	0.383	0.45	0.641
2015-11-03	0.274	0.384	0.406	0.64
2015-11-04	0.496	0.434	0.389	0.651
2015-11-05	0.544	0.413	0.387	0.612
2015-11-06	0.543	0.422	0.391	0.603
2015-11-09	0.351	0.407	0.383	0.603
2015-11-10	0.348	0.377	0.383	0.587
2015-11-11	0.244	0.341	0.371	0.538
2015-11-12	0.263	0.345	0.378	0.484
2015-11-13	0.228	0.36	0.383	0.471
2015-11-16	0.266	0.361	0.383	0.449
2015-11-17	0.271	0.366	0.374	0.418
2015-11-18	0.235	0.359	0.378	0.418
2015-11-19	0.335	0.374	0.372	0.418
2015-11-20	0.276	0.373	0.371	0.417
2015-11-23	0.313	0.351	0.363	0.414
2015-11-24	0.317	0.35	0.363	0.412
2015-11-25	0.295	0.29	0.363	0.409
2015-11-26	0.215	0.258	0.34	0.406
2015-11-27	0.39	0.306	0.37	0.423
2015-11-30	0.38	0.303	0.366	0.414
2015-12-01	0.344	0.304	0.344	0.386
2015-12-02	0.398	0.314	0.334	0.362
2015-12-03	0.412	0.309	0.326	0.356
2015-12-04	0.236	0.309	0.331	0.36
2015-12-07	0.232	0.301	0.331	0.353
2015-12-08	0.292	0.31	0.337	0.356
2015-12-09	0.223	0.309	0.333	0.351
2015-12-10	0.203	0.274	0.332	0.35
2015-12-11	0.185	0.276	0.332	0.349
2015-12-14	0.289	0.296	0.325	0.353
2015-12-15	0.217	0.303	0.328	0.348
2015-12-16	0.228	0.302	0.295	0.349
2015-12-17	0.222	0.315	0.283	0.342
2015-12-18	0.233	0.231	0.273	0.341
2015-12-21	0.191	0.231	0.276	0.33
2015-12-22	0.209	0.237	0.277	0.331
2015-12-23	0.24	0.238	0.278	0.333
2015-12-24	0.18	0.239	0.273	0.317
2015-12-25	0.198	0.221	0.267	0.316
2015-12-28	0.164	0.235	0.268	0.315
2015-12-29	0.184	0.211	0.266	0.301
2015-12-30	0.252	0.227	0.275	0.296
2015-12-31	0.303	0.249	0.268	0.295
2016-01-04	0.533	0.374	0.325	0.329
2016-01-05	0.586	0.365	0.327	0.332
2016-01-06	0.599	0.36	0.327	0.333
2016-01-07	0.692	0.468	0.389	0.371
2016-01-08	0.833	0.493	0.408	0.381
2016-01-11	0.759	0.515	0.402	0.392
2016-01-12	0.713	0.507	0.405	0.387
2016-01-13	0.661	0.513	0.412	0.393
2016-01-14	0.529	0.522	0.409	0.375
2016-01-15	0.348	0.534	0.42	0.373
2016-01-18	0.35	0.531	0.418	0.368
2016-01-19	0.439	0.553	0.426	0.373
2016-01-20	0.381	0.553	0.424	0.374
2016-01-21	0.42	0.536	0.43	0.377
2016-01-22	0.321	0.545	0.433	0.377
2016-01-25	0.32	0.493	0.432	0.375
2016-01-26	0.573	0.551	0.468	0.406
2016-01-27	0.547	0.539	0.462	0.406
2016-01-28	0.573	0.49	0.473	0.415
2016-01-29	0.655	0.475	0.48	0.416
2016-02-01	0.634	0.457	0.479	0.415
2016-02-02	0.456	0.467	0.479	0.416
2016-02-03	0.451	0.459	0.48	0.414
2016-02-04	0.302	0.452	0.48	0.414
2016-02-05	0.228	0.437	0.481	0.416
2016-02-15	0.233	0.434	0.478	0.404
2016-02-16	0.34	0.444	0.493	0.413
2016-02-17	0.368	0.452	0.497	0.415
2016-02-18	0.343	0.442	0.487	0.412
2016-02-19	0.275	0.439	0.488	0.412
2016-02-22	0.213	0.453	0.466	0.415
2016-02-23	0.202	0.333	0.459	0.414
2016-02-24	0.188	0.331	0.458	0.413
2016-02-25	0.611	0.419	0.458	0.443
2016-02-26	0.597	0.395	0.437	0.443
2016-02-29	0.529	0.419	0.433	0.448
2016-03-01	0.599	0.419	0.437	0.444
2016-03-02	0.746	0.469	0.458	0.456
2016-03-03	0.483	0.466	0.456	0.457
2016-03-04	0.48	0.458	0.445	0.453
2016-03-07	0.306	0.454	0.444	0.454
2016-03-08	0.315	0.434	0.436	0.452
2016-03-09	0.072	0.429	0.436	0.452
2016-03-10	0.097	0.431	0.43	0.451
2016-03-11	0.101	0.429	0.428	0.452
2016-03-14	0.146	0.421	0.43	0.452
2016-03-15	0.144	0.42	0.373	0.452
2016-03-16	0.141	0.418	0.372	0.451
2016-03-17	0.1	0.276	0.35	0.448
2016-03-18	0.098	0.275	0.339	0.448
2016-03-21	0.116	0.213	0.342	0.429
2016-03-22	0.107	0.211	0.339	0.425
2016-03-23	0.108	0.116	0.339	0.424
2016-03-24	0.165	0.128	0.337	0.392
2016-03-25	0.158	0.127	0.33	0.38
2016-03-28	0.077	0.128	0.328	0.37
2016-03-29	0.093	0.138	0.317	0.368
2016-03-30	0.179	0.151	0.317	0.365
2016-03-31	0.161	0.137	0.317	0.364
2016-04-01	0.168	0.139	0.318	0.355
2016-04-05	0.163	0.134	0.311	0.355
2016-04-06	0.112	0.134	0.31	0.35
2016-04-07	0.103	0.14	0.31	0.35
2016-04-08	0.199	0.169	0.225	0.348
2016-04-11	0.211	0.172	0.227	0.348
2016-04-12	0.203	0.163	0.198	0.348
2016-04-13	0.261	0.178	0.198	0.307
2016-04-14	0.268	0.182	0.152	0.307
2016-04-15	0.193	0.178	0.153	0.29
2016-04-18	0.214	0.189	0.159	0.284
2016-04-19	0.196	0.189	0.159	0.283
2016-04-20	0.242	0.225	0.184	0.289
2016-04-21	0.188	0.21	0.185	0.289
2016-04-22	0.218	0.211	0.182	0.287
2016-04-25	0.222	0.204	0.182	0.284
2016-04-26	0.245	0.205	0.179	0.282
2016-04-27	0.095	0.206	0.18	0.273
2016-04-28	0.088	0.205	0.18	0.271
2016-04-29	0.083	0.188	0.177	0.271
2016-05-03	0.183	0.206	0.187	0.275
2016-05-04	0.182	0.201	0.18	0.27
2016-05-05	0.164	0.187	0.18	0.27
2016-05-06	0.288	0.21	0.197	0.276
2016-05-09	0.329	0.225	0.205	0.225
2016-05-10	0.241	0.223	0.205	0.224
2016-05-11	0.241	0.223	0.205	0.208
2016-05-12	0.241	0.189	0.204	0.204
2016-05-13	0.173	0.189	0.196	0.176
2016-05-16	0.047	0.189	0.197	0.175
2016-05-17	0.059	0.19	0.194	0.176
2016-05-18	0.092	0.188	0.193	0.176
2016-05-19	0.087	0.187	0.194	0.177
2016-05-20	0.086	0.187	0.193	0.177
2016-05-23	0.137	0.198	0.19	0.177
2016-05-24	0.175	0.175	0.19	0.181
2016-05-25	0.173	0.175	0.188	0.179
2016-05-26	0.171	0.174	0.18	0.179
2016-05-27	0.171	0.141	0.176	0.179
2016-05-30	0.124	0.108	0.176	0.177
2016-05-31	0.305	0.211	0.218	0.201
2016-06-01	0.31	0.211	0.218	0.197
2016-06-02	0.302	0.212	0.199	0.198
2016-06-03	0.301	0.212	0.199	0.198
2016-06-06	0.297	0.211	0.198	0.197
2016-06-07	0.055	0.21	0.199	0.197
2016-06-08	0.107	0.211	0.202	0.2
2016-06-13	0.301	0.264	0.227	0.214
2016-06-14	0.302	0.263	0.227	0.21
2016-06-15	0.329	0.264	0.231	0.213
2016-06-16	0.331	0.254	0.221	0.212
2016-06-17	0.34	0.261	0.228	0.215
2016-06-20	0.171	0.263	0.228	0.216
2016-06-21	0.204	0.269	0.215	0.216
2016-06-22	0.19	0.27	0.205	0.212
2016-06-23	0.179	0.206	0.205	0.21
2016-06-24	0.15	0.213	0.209	0.21
2016-06-27	0.223	0.229	0.217	0.213
2016-06-28	0.193	0.232	0.218	0.213
2016-06-29	0.194	0.232	0.218	0.213
2016-06-30	0.204	0.233	0.218	0.21
